# Supplementary material
Source: publisher figshare collection journal article supplement (https://gsajournals.figshare.com/articles/dataset/_/12437177)
Supplement: Supplementary file 2 [file 1]

# Supplemental Table of Mutations

Nicholas A. Sherer, Thomas E. Kuhlman

May 29, 2020

This file contains the mutations found by BreSeq for all samples. In order to make the tables fit better, we have abbreviated the sample names. L1 = Low 1, L2 = Low 2, LM 1 = LoMid 1, and so on. t1 are samples from day 24, and t2 are sample from day 41. Anc1, Anc2, and Anc3 are sequenced samples of the ancestral strain NS001 $\Delta$ *cat*, and AncAgg is a Breseq analysis of these three samples aggregated together to improve coverage.

The first table of SNP mutations has eight columns: the chromosome position of the mutation in the reference sequence of NS001 $\Delta$ *cat*, the reference nucleotide, the mutation nucleotide, the local sequence for five base pairs in both direction from the mutation (which is surround by curly brackets), the name of the gene if the mutation is inside a gene, the reference amino acid if the mutation is inside a gene, the new amino acid post-mutation, and the samples the mutation was found in.

The second table of deletion mutations has five columns: the chromosome position of the deletion in the reference sequence, the number of basepairs deleted, the local sequence for five base pairs in both directions from the first base pair with the deleted basepairs struck through, the name of the gene if the mutation is inside a gene or the names of the two genes the mutation is between with a / between the two names, and the samples the mutation was found in.

The third table of insertion mutations has five columns: the chromosome position of the start of the insertion in the reference sequence, the newly inserted sequence, the local sequence for five base pairs in each direction around the insertion with the insertion in curly braces, the name of the gene the insertion is in if it is inside a gene or the name of the two genes the mutation is between with a / between the two names, and the samples the mutation was found in.

The fourth table of mobile element mutations has seven columns: the position of the mutation, the name of the mobile element, the strand of the mobile element insertion, the size of any duplications of sequence of the target site next to the mobile element insertion, the repeat size of the mobile element, the gene, and the samples the mutation was found in.

Table 1: SNP Mutations

| position | ref | new | local sequence | gene | ref AA | new AA | samples                             |
|----------|-----|-----|----------------|------|--------|--------|-------------------------------------|
| 629      | T   | C   | GGAAT{C}TGCCC  | thrA | F      | S      | L1t1                                |
| 4859     | A   | G   | TCGGC{G}CCGCG  | thrC | T      | A      | H3t1, H3t2,<br>LM1t1,<br>M2t1, M2t2 |
| 6573     | G   | A   | CTGGC{A}ACCGA  | yaaJ | R      | C      | HM1t1                               |
| 15292    | C   | G   | CTGAC{G}CGCTA  | dnaJ | T      | T      | LM1t2                               |
| 18711    | A   | T   | GGGAG{T}GAAAT  | None | N/A    | N/A    | M3t2                                |
| 19166    | A   | G   | TTCTG{G}CTGTC  | nhaR | D      | G      | M4t1                                |
| 21797    | G   | A   | TTGGC{A}CTGGT  | ribF | A      | T      | L3t2                                |
| 26063    | C   | T   | TGATT{T}AGTAC  | fkpB | Q      | *      | LM1t1                               |
| 31829    | A   | G   | GAACG{G}CATCA  | carB | D      | G      | M2t1                                |
| 36745    | C   | T   | GGGAG{T}GGGCG  | caiC | P      | P      | LM4t2                               |
| 42773    | A   | G   | TTCCG{G}CCTTT  | fixA | D      | G      | H3t1                                |
| 45350    | T   | C   | ACCTG{C}TCACC  | fixC | F      | L      | L4t1                                |

Table 1: SNP Mutations (continued)

| position | ref | new | local sequence | gene      | ref AA | new AA | samples                                                                                                                                                                                                                                    |
|----------|-----|-----|----------------|-----------|--------|--------|--------------------------------------------------------------------------------------------------------------------------------------------------------------------------------------------------------------------------------------------|
| 49349    | T   | C   | GGGCG{C}CTGGC  | kefC      | R      | R      | LM1t1,<br>LM1t2                                                                                                                                                                                                                            |
| 52263    | G   | A   | CGTTC{A}CCGAC  | rsmA      | G      | G      | HM3t1                                                                                                                                                                                                                                      |
| 61485    | T   | A   | ACCAA{A}ACGCT  | rapA      | I      | F      | H1t2                                                                                                                                                                                                                                       |
| 67199    | G   | A   | GGCGG{A}CAGGA  | araA      | A      | V      | L3t1                                                                                                                                                                                                                                       |
| 74995    | T   | C   | CCCGG{C}GTACT  | thiB      | T      | T      | H4t2                                                                                                                                                                                                                                       |
| 82631    | T   | C   | CCTGG{C}GTATA  | leuA      | H      | R      | HM2t1                                                                                                                                                                                                                                      |
| 85118    | T   | C   | TGGTG{C}CGCAA  | leuO      | S      | P      | HM1t2                                                                                                                                                                                                                                      |
| 92156    | G   | A   | GAAGT{A}AACAA  | ftsI      | L      | L      | H2t1                                                                                                                                                                                                                                       |
| 94425    | A   | G   | GAAGA{G}CCGCG  | murE      | E      | E      | H1t2                                                                                                                                                                                                                                       |
| 95476    | C   | T   | GCTGC{T}GTTGC  | murF      | P      | L      | L2t1, L2t2,<br>L4t1, L4t2,<br>LM4t1,<br>LM4t2,<br>M2t1, M2t2                                                                                                                                                                               |
| 95700    | C   | T   | AAATG{T}CGGGC  | murF      | P      | S      | H3t1, H3t2                                                                                                                                                                                                                                 |
| 96361    | G   | A   | AAAGT{A}GTGCG  | mraY      | V      | V      | M3t1                                                                                                                                                                                                                                       |
| 96791    | T   | C   | AGGTC{C}TTATG  | mraY      | F      | L      | M2t1                                                                                                                                                                                                                                       |
| 100018   | A   | G   | CATGA{G}CAAAA  | murG      | E      | E      | HM4t1,<br>HM4t2                                                                                                                                                                                                                            |
| 102236   | A   | G   | ACATG{G}CTGAT  | murC—ddlB | D—T    | G—A    | AncAgg,<br>Anc1,<br>Anc2, Anc3,<br>H1t1, H1t2,<br>HM2t1,<br>HM2t2,<br>HM3t2,<br>HM4t1,<br>HM4t2,<br>L1t1, L2t1,<br>L2t2, L3t1,<br>L4t1, L4t2,<br>LM1t1,<br>LM1t2,<br>LM2t1,<br>LM3t1,<br>LM3t2,<br>LM4t1,<br>LM4t2,<br>M1t1, M2t1,<br>M3t1 |
| 102650   | C   | T   | GTTTG{T}CGGTT  | ddlB      | P      | S      | M2t1                                                                                                                                                                                                                                       |
| 105395   | C   | T   | TGGTG{T}GCGAG  | ftsZ      | R      | C      | H1t1                                                                                                                                                                                                                                       |
| 118166   | A   | G   | GCTGA{G}CGCAG  | nadC      | R      | R      | HM3t1                                                                                                                                                                                                                                      |
| 135682   | G   | A   | TAACG{A}CATTT  | speE      | C      | C      | LM2t1                                                                                                                                                                                                                                      |
| 136141   | T   | C   | TCGAT{C}TCCAC  | speE      | E      | E      | HM2t1                                                                                                                                                                                                                                      |
| 138095   | C   | T   | CCTGC{T}TGCGT  | cueO      | P      | L      | M2t1, M2t2                                                                                                                                                                                                                                 |
| 148930   | A   | T   | ATGTG{T}CCGCC  | panB      | G      | G      | HM2t1                                                                                                                                                                                                                                      |

Table 1: SNP Mutations (continued)

| position | ref | new | local sequence | gene | ref AA | new AA | samples                                                                                                                                                              |
|----------|-----|-----|----------------|------|--------|--------|----------------------------------------------------------------------------------------------------------------------------------------------------------------------|
| 150262   | A   | G   | CTACA{G}CTTTT  | yadC | V      | A      | H1t2                                                                                                                                                                 |
| 152255   | G   | A   | TAGAT{A}AAATT  | yadM | F      | F      | AncAgg                                                                                                                                                               |
| 155269   | T   | C   | CACTG{C}ACCGG  | htrE | Y      | C      | AncAgg,<br>Anc1,<br>Anc2, Anc3,<br>H1t2, H3t1,<br>H4t1, H4t2,<br>HM1t1,<br>HM1t2,<br>L1t1,<br>L1t2, L2t2,<br>L4t1, L4t2,<br>LM3t1,<br>LM4t1,<br>LM4t2,<br>M2t1, M2t2 |
| 156328   | T   | C   | AGTGT{C}AGTTT  | yadN | N      | D      | M3t1                                                                                                                                                                 |
| 158657   | T   | C   | GGGCG{C}CTTCT  | pcnB | D      | G      | H2t1, H2t2                                                                                                                                                           |
| 159546   | A   | T   | TGATC{T}TCAAC  | gluQ | D      | E      | H4t2                                                                                                                                                                 |
| 160510   | A   | G   | CATTC{G}TATAC  | dksA | M      | T      | H2t2                                                                                                                                                                 |
| 164919   | G   | A   | AACGC{A}GCTGG  | mrcB | G      | S      | H1t1, H1t2                                                                                                                                                           |
| 170054   | C   | T   | CGCAG{T}AGCTT  | fhuC | Q      | *      | L1t1                                                                                                                                                                 |
| 175451   | G   | A   | GGGGC{A}CTGGA  | clcA | A      | A      | L1t1, L1t2                                                                                                                                                           |
| 177066   | G   | A   | CAGCC{A}AATCA  | yadS | R      | W      | M3t1                                                                                                                                                                 |
| 181258   | T   | C   | GGCTA{C}GCCGT  | degP | Y      | Y      | M4t1                                                                                                                                                                 |
| 201161   | A   | G   | CCAGG{G}CGATC  | lpxD | D      | G      | H3t1                                                                                                                                                                 |
| 201924   | A   | G   | GCTGC{G}CTGGT  | lpxD | A      | A      | HM2t2                                                                                                                                                                |
| 203414   | G   | A   | TGGGG{A}CCGGT  | lpxB | A      | T      | HM1t1                                                                                                                                                                |
| 206265   | T   | A   | CTCGA{A}CCGCT  | dnaE | D      | E      | H3t2                                                                                                                                                                 |
| 207479   | C   | T   | GGCGG{T}GGTAA  | dnaE | A      | V      | L2t1                                                                                                                                                                 |
| 210135   | A   | T   | GGCAT{T}TGGGC  | ldcC | M      | L      | LM2t1                                                                                                                                                                |
| 212693   | T   | C   | CAATG{C}GAAAC  | tilS | C      | C      | L2t2                                                                                                                                                                 |
| 218194   | G   | A   | TGTAC{A}GCGCG  | proS | A      | A      | Anc3                                                                                                                                                                 |
| 220015   | A   | G   | GTATG{G}TCAAA  | None | N/A    | N/A    | H2t1                                                                                                                                                                 |
| 226241   | A   | G   | AAAGA{G}CCCCG  | rrlH | None   | None   | HM2t1                                                                                                                                                                |
| 226391   | A   | G   | GGGAA{G}CCGAG  | rrlH | None   | None   | HM4t2                                                                                                                                                                |
| 229616   | T   | C   | GCTAC{C}AACCA  | dkgB | T      | T      | HM3t2                                                                                                                                                                |
| 250760   | A   | G   | TGGGG{G}TAAAG  | lafU | None   | None   | H4t2                                                                                                                                                                 |
| 253477   | A   | G   | ATGGT{G}CATGG  | ykfJ | None   | None   | LM2t2                                                                                                                                                                |
| 254821   | G   | A   | ACAAG{A}CCAGA  | pepD | A      | V      | LM2t1                                                                                                                                                                |
| 260633   | A   | G   | CGGAC{G}CCACT  | proB | H      | R      | M1t1, M1t2                                                                                                                                                           |
| 279321   | C   | T   | ATTGA{T}AGATT  | None | N/A    | N/A    | Anc3                                                                                                                                                                 |
| 281212   | G   | A   | TAAAC{A}GGTTC  | None | N/A    | N/A    | L4t1                                                                                                                                                                 |
| 282458   | G   | A   | AGGAC{A}ACGCG  | yagF | D      | N      | Anc1                                                                                                                                                                 |
| 284193   | T   | C   | CCCGC{C}GACGC  | yagF | L      | P      | HM4t2                                                                                                                                                                |
| 288512   | G   | A   | AACGC{A}CAGCG  | None | N/A    | N/A    | M4t1                                                                                                                                                                 |

Table 1: SNP Mutations (continued)

| position | ref | new | local sequence | gene | ref AA | new AA | samples                                                                                             |
|----------|-----|-----|----------------|------|--------|--------|-----------------------------------------------------------------------------------------------------|
| 297632   | A   | G   | GTCAA{G}CCACG  | paoD | F      | L      | H1t1                                                                                                |
| 301997   | T   | A   | TACGA{A}GCAAA  | None | N/A    | N/A    | M2t2                                                                                                |
| 302668   | G   | T   | TCATG{T}GACTG  | yagU | G      | *      | M1t1                                                                                                |
| 304450   | A   | G   | CGCTG{G}CTTCG  | ecpD | V      | A      | H3t1                                                                                                |
| 321059   | G   | A   | TCACC{A}GCTGG  | ykgE | P      | P      | LM2t1                                                                                               |
| 327888   | A   | G   | CTCGA{G}GGTGC  | betB | F      | L      | AncAgg,<br>Anc1,<br>Anc2, Anc3,<br>H3t1, H3t2,<br>HM3t1,<br>HM3t2,<br>L2t1, L4t1,<br>LM1t1,<br>M3t1 |
| 328154   | C   | T   | AGATT{T}GACAG  | betI | S      | S      | HM2t1                                                                                               |
| 332952   | T   | C   | TAAAA{C}CTGGC  | yahB | I      | V      | H3t2                                                                                                |
| 337087   | A   | G   | ATGGA{G}AAACA  | yahF | E      | E      | L4t2                                                                                                |
| 339066   | T   | C   | ATTTG{C}CACCA  | yahH | V      | A      | HM2t2                                                                                               |
| 339072   | T   | C   | CACCA{C}TGCCG  | yahH | I      | T      | HM2t2                                                                                               |
| 339089   | A   | G   | GCGTG{G}ACGCC  | yahH | N      | D      | HM2t2                                                                                               |
| 339687   | G   | A   | TAACC{A}GCTGG  | yahI | R      | Q      | LM3t1                                                                                               |
| 339961   | C   | T   | ATTGG{T}GCGGG  | yahI | G      | G      | H1t1, H1t2,<br>L1t1, L1t2                                                                           |
| 340875   | A   | G   | GTCGA{G}AGGCA  | yahJ | K      | R      | HM4t2                                                                                               |
| 342821   | C   | T   | AGTTT{T}GATTT  | yahK | F      | F      | H1t2                                                                                                |
| 345537   | T   | C   | ATCCA{C}AAATA  | yahN | M      | V      | H3t2                                                                                                |
| 347948   | A   | G   | CACTG{G}CTAAA  | prpB | T      | A      | LM1t1,<br>LM1t2                                                                                     |
| 348897   | G   | C   | AGACG{C}ATGGC  | None | N/A    | N/A    | HM3t1                                                                                               |
| 349427   | G   | A   | CATCT{A}CTGAT  | prpC | L      | L      | M2t1                                                                                                |
| 361925   | A   | G   | ACATG{G}TGCCG  | lacY | I      | T      | LM4t1                                                                                               |
| 369167   | A   | G   | CGGTA{G}TTGGC  | mhpA | I      | V      | L1t2                                                                                                |
| 371579   | A   | G   | TTGGG{G}CGTTA  | mhpD | T      | A      | LM1t2                                                                                               |
| 372230   | T   | C   | GCATC{C}GGAGA  | mhpF | L      | P      | HM1t1                                                                                               |
| 372488   | T   | C   | GGTGG{C}TAACC  | mhpF | V      | A      | LM1t2                                                                                               |
| 374364   | C   | T   | GGATG{T}GGCGT  | None | N/A    | N/A    | H1t1                                                                                                |
| 374392   | G   | A   | TACGG{A}TGGCG  | None | N/A    | N/A    | L2t2                                                                                                |
| 375693   | C   | T   | ATCCG{T}GCAAC  | mhpT | R      | R      | LM3t1                                                                                               |
| 385498   | G   | A   | CTGAC{A}CTGGA  | tauB | T      | T      | HM2t2                                                                                               |
| 385882   | A   | G   | TTATT{G}CTCGA  | tauB | L      | L      | HM2t1                                                                                               |
| 387912   | A   | G   | GGGTT{G}GGGTG  | None | N/A    | N/A    | LM4t2                                                                                               |
| 392619   | T   | A   | TTATC{A}ACGTA  | yaiT | None   | None   | H3t1                                                                                                |
| 392709   | A   | G   | GCGGT{G}ACACC  | yaiT | None   | None   | M1t2                                                                                                |
| 401034   | G   | A   | AGCCC{A}GACAC  | phoA | R      | Q      | M1t2                                                                                                |
| 403028   | C   | T   | CCGGG{T}TGCGC  | dgcC | L      | L      | H1t1                                                                                                |
| 409266   | T   | A   | GTCGT{A}AAATT  | None | N/A    | N/A    | H1t2                                                                                                |
| 409298   | C   | T   | GTCGG{T}GGCCT  | None | N/A    | N/A    | M3t2                                                                                                |

Table 1: SNP Mutations (continued)

| position | ref | new | local sequence | gene | ref AA | new AA | samples                                                                                                                                     |
|----------|-----|-----|----------------|------|--------|--------|---------------------------------------------------------------------------------------------------------------------------------------------|
| 412523   | C   | T   | GCCAA{T}CCGTC  | sbcC | G      | G      | HM3t2                                                                                                                                       |
| 413670   | A   | G   | GGGGA{G}CAATC  | sbcC | V      | A      | H4t2                                                                                                                                        |
| 419369   | T   | C   | CTGCG{C}TTTCT  | brnQ | F      | L      | AncAgg,<br>Anc2,<br>H3t2, H4t2,<br>L1t1, L1t2,<br>L2t1, L2t2,<br>LM1t1,<br>LM2t1,<br>LM3t1,<br>LM4t1,<br>M1t1, M1t2,<br>M2t1, M2t2,<br>M4t1 |
| 422968   | T   | C   | ATATC{C}CTTAC  | malZ | S      | P      | M4t1                                                                                                                                        |
| 438688   | A   | T   | CAGGC{T}CTACC  | dxs  | V      | E      | L4t1                                                                                                                                        |
| 439689   | T   | C   | CTCTC{C}GCATA  | ispA | A      | A      | HM1t2                                                                                                                                       |
| 448773   | G   | A   | CAGTT{A}AAGAT  | cyoB | F      | F      | H1t1, H1t2                                                                                                                                  |
| 456759   | C   | T   | ATCTG{T}GACGA  | clpX | C      | C      | HM1t1,<br>HM1t2                                                                                                                             |
| 469858   | G   | A   | CCGTC{A}ATGCG  | mdlA | D      | N      | M4t2                                                                                                                                        |
| 480088   | G   | A   | AGGAA{A}CGGGA  | None | N/A    | N/A    | L3t1, L3t2                                                                                                                                  |
| 487001   | G   | A   | TGCAA{A}TGGTT  | mscK | V      | M      | H3t1, H3t2                                                                                                                                  |
| 491023   | C   | T   | GCTGG{T}AACCG  | apt  | A      | V      | HM2t1                                                                                                                                       |
| 501637   | C   | T   | AATGG{T}AGCGT  | ybaL | L      | L      | LM1t1                                                                                                                                       |
| 512235   | A   | G   | TTTCA{G}CTCCT  | ybaT | N      | S      | H3t2                                                                                                                                        |
| 516531   | T   | C   | TATCG{C}AAGTT  | fetB | R      | R      | LM4t1                                                                                                                                       |
| 522758   | T   | C   | CGTTT{C}CGGCC  | rhsD | F      | S      | M1t2                                                                                                                                        |
| 522818   | T   | C   | ACTGA{C}ACTCA  | rhsD | I      | T      | LM4t2                                                                                                                                       |
| 523100   | A   | C   | GCCGT{C}CCGGG  | rhsD | Y      | S      | L4t1                                                                                                                                        |
| 524183   | T   | C   | GGCGG{C}CCACC  | rhsD | V      | A      | L2t1, L2t2,<br>L4t1, L4t2,<br>LM4t2,<br>M2t1, M2t2                                                                                          |
| 524492   | A   | G   | GGTAC{G}GCAGG  | rhsD | Q      | R      | LM4t1,<br>LM4t2                                                                                                                             |
| 528733   | C   | T   | AAAAC{T}AGCGG  | ylbI | None   | None   | L2t1, L2t2,<br>L4t1,<br>LM4t1,<br>LM4t2,<br>M2t1, M2t2                                                                                      |
| 531326   | A   | T   | CTTCC{T}GAAGT  | allS | L      | Q      | M4t2                                                                                                                                        |
| 534277   | A   | G   | GATGA{G}CAAAG  | gcl  | N      | S      | H1t2                                                                                                                                        |
| 536216   | C   | T   | GTTGG{T}GGTGA  | glxR | G      | G      | LM2t2                                                                                                                                       |
| 545014   | A   | G   | ATATT{G}CGCGA  | allD | R      | R      | H4t1, H4t2                                                                                                                                  |

Table 1: SNP Mutations (continued)

| position | ref | new | local sequence | gene | ref AA | new AA | samples                                                                                                                                                         |
|----------|-----|-----|----------------|------|--------|--------|-----------------------------------------------------------------------------------------------------------------------------------------------------------------|
| 547336   | C   | T   | GCGGT{T}GTGAG  | fdrA | V      | V      | AncAgg,<br>Anc1, Anc2,<br>H1t1, H1t2,<br>HM2t1,<br>HM2t2,<br>HM3t2,<br>HM4t1,<br>HM4t2,<br>L1t1,<br>L2t1, L2t2,<br>LM1t1,<br>LM1t2,<br>LM2t1,<br>LM2t2,<br>M1t1 |
| 549169   | C   | T   | TCAAC{T}ACTTG  | ylbF | P      | L      | HM4t1                                                                                                                                                           |
| 550863   | T   | A   | CAAAT{A}CAGAT  | purK | N      | Y      | L3t2                                                                                                                                                            |
| 554861   | T   | A   | CTTTA{A}TGAAG  | cysS | I      | N      | L3t1                                                                                                                                                            |
| 562980   | A   | C   | ACTAA{C}CTTTT  | sfmF | N      | T      | LM1t1                                                                                                                                                           |
| 564204   | A   | G   | GAAGC{G}CTGAT  | intD | V      | A      | H1t1                                                                                                                                                            |
| 578082   | A   | G   | TAAGC{G}GGGCC  | borD | L      | P      | HM4t1                                                                                                                                                           |
| 579498   | T   | C   | ATTGA{C}GTATA  | yleI | T      | T      | HM1t1                                                                                                                                                           |
| 584436   | G   | A   | GTTGA{A}GAGCC  | ompT | L      | F      | L3t1                                                                                                                                                            |
| 584582   | G   | A   | GAGTT{A}TCCAG  | ompT | T      | I      | M3t2                                                                                                                                                            |
| 585342   | C   | T   | TTATG{T}CCGTC  | None | N/A    | N/A    | HM1t2                                                                                                                                                           |
| 588387   | G   | A   | AGTGC{A}AGTTC  | nfrA | L      | L      | H3t1                                                                                                                                                            |
| 594522   | T   | C   | GAGGA{C}TATCA  | cusR | I      | V      | M2t1                                                                                                                                                            |
| 611854   | C   | T   | CGCTT{T}CCACG  | None | N/A    | N/A    | HM4t2                                                                                                                                                           |
| 612828   | G   | A   | TGTAT{A}CCGGA  | fes  | A      | T      | L3t1                                                                                                                                                            |
| 621648   | T   | A   | GCCGG{A}GCAGA  | entS | V      | E      | M1t2                                                                                                                                                            |
| 622512   | T   | A   | CTCGT{A}GCTGC  | entS | L      | *      | H4t2                                                                                                                                                            |
| 626831   | T   | C   | TTCAC{C}TCCGC  | entE | L      | P      | HM2t2                                                                                                                                                           |
| 641743   | C   | A   | TATGT{A}CGCGT  | ybdR | V      | V      | M2t1                                                                                                                                                            |
| 650725   | A   | G   | CCATC{G}CGCCG  | citC | V      | A      | HM3t2                                                                                                                                                           |
| 656535   | A   | G   | AGGTA{G}CGTTA  | cspE | N      | S      | H1t1                                                                                                                                                            |
| 663244   | C   | T   | AAATG{T}ACTAC  | None | N/A    | N/A    | H2t1                                                                                                                                                            |
| 674777   | G   | A   | TCCCC{A}GCCCT  | None | N/A    | N/A    | L4t1                                                                                                                                                            |
| 676330   | T   | C   | CTTAA{C}AACTG  | ybeR | N      | N      | HM1t1                                                                                                                                                           |
| 682102   | A   | G   | CCGAG{G}TCAAA  | hscC | D      | D      | H2t1                                                                                                                                                            |
| 685925   | G   | A   | GCAGC{A}TTAAC  | None | N/A    | N/A    | HM1t1                                                                                                                                                           |
| 688598   | A   | G   | TCAAC{G}CAGCA  | lnt  | V      | A      | M1t1                                                                                                                                                            |
| 693308   | C   | T   | GTTTA{T}GGATG  | miaB | R      | H      | Anc3                                                                                                                                                            |
| 701321   | T   | A   | CGCGT{A}GTACA  | nagA | N      | Y      | HM4t1                                                                                                                                                           |
| 714160   | T   | C   | GGCGC{C}GTCTA  | pgm  | L      | P      | H3t1, H3t2                                                                                                                                                      |
| 721768   | A   | T   | CCGGG{T}TCATC  | kdpD | I      | N      | Anc2                                                                                                                                                            |
| 729693   | T   | C   | GTGGC{C}GACGC  | rhsC | L      | P      | HM4t2                                                                                                                                                           |
| 732417   | A   | G   | GTATT{G}CAACC  | rhsC | Y      | C      | M3t1, M3t2                                                                                                                                                      |

Table 1: SNP Mutations (continued)

| position | ref | new | local sequence | gene | ref AA | new AA | samples                                                |
|----------|-----|-----|----------------|------|--------|--------|--------------------------------------------------------|
| 735938   | A   | G   | TTTGT{G}CTAAA  | None | N/A    | N/A    | AncAgg,<br>Anc3                                        |
| 737412   | A   | G   | TGTTG{G}CTATT  | ybfD | T      | A      | M2t1                                                   |
| 738667   | T   | C   | CTGGC{C}TTCAG  | ybgA | L      | P      | LM2t2                                                  |
| 740664   | C   | T   | GTGAC{T}ATACA  | dtpD | G      | S      | H3t1, H3t2                                             |
| 740742   | T   | C   | AAATT{C}CCCC   | dtpD | K      | E      | LM1t1                                                  |
| 760955   | T   | C   | ACGTC{C}CGTCA  | sucB | S      | S      | M2t2                                                   |
| 767053   | G   | A   | CGGGC{A}GTGTT  | mngA | G      | S      | L4t1                                                   |
| 769108   | T   | C   | GCAGT{C}TGGTT  | mngB | F      | S      | M3t1                                                   |
| 781533   | T   | C   | TTCGG{C}GCAAA  | nadA | G      | G      | M3t1                                                   |
| 783094   | C   | T   | TCACG{T}GCGCT  | pnuC | R      | R      | HM2t1                                                  |
| 785320   | A   | G   | CGCTG{G}CCTGA  | aroG | D      | G      | LM2t1,<br>LM2t2                                        |
| 786407   | G   | A   | AACGC{A}GATCG  | gpmA | P      | L      | M2t1                                                   |
| 787176   | C   | G   | GGTTC{G}CCGCG  | galM | G      | R      | L4t2                                                   |
| 788487   | C   | T   | GCTGG{T}TGCTG  | galK | Q      | Q      | LM4t2                                                  |
| 810029   | T   | C   | CAGTT{C}AAGCC  | bioF | L      | S      | H1t2                                                   |
| 815411   | A   | T   | GGTCG{T}TATTG  | ybhK | I      | N      | L4t1                                                   |
| 820129   | C   | T   | ACTAG{T}CTGGG  | ybhM | A      | V      | H4t2                                                   |
| 831725   | C   | T   | AACTC{T}ATTAA  | ybiA | M      | I      | Anc1                                                   |
| 834245   | T   | C   | CCTGA{C}TCAGC  | dinG | I      | T      | HM4t2                                                  |
| 835236   | A   | G   | TATGA{G}AAACA  | ybiB | E      | E      | HM1t1                                                  |
| 837296   | A   | G   | AAACC{G}TTTAT  | None | N/A    | N/A    | H2t2                                                   |
| 841183   | T   | C   | GTAGC{C}GACCG  | mcbA | Q      | R      | HM1t1                                                  |
| 856693   | A   | G   | TGGCG{G}CCCGC  | ybiT | T      | A      | H4t1, H4t2                                             |
| 863618   | C   | T   | ACACA{T}CTCAC  | moeB | V      | M      | M1t1, M1t2                                             |
| 873142   | T   | A   | AATTT{A}CTGAA  | pdeI | S      | T      | HM4t1                                                  |
| 877209   | A   | G   | TTCGG{G}CAGCC  | rimO | C      | C      | L2t1, L2t2,<br>L4t1, L4t2,<br>LM2t1,<br>LM4t2,<br>M2t2 |
| 878041   | A   | G   | CGGTA{G}ATGTC  | ylil | N      | D      | M1t1                                                   |
| 880668   | G   | A   | CCACG{A}CAGGC  | dacC | A      | T      | LM2t1                                                  |
| 883902   | C   | T   | TGGTG{T}GATTA  | mdfA | R      | *      | HM1t1                                                  |
| 884954   | T   | C   | ACGTA{C}TCCAG  | ybjI | E      | E      | HM4t1                                                  |
| 893830   | G   | A   | CGATG{A}CGTTC  | potF | A      | T      | H1t1                                                   |
| 895878   | T   | A   | GGTTA{A}CGATC  | potH | I      | N      | L4t2                                                   |
| 897116   | A   | G   | AAAAC{G}GCGGA  | potI | Q      | R      | HM1t1                                                  |
| 898660   | A   | G   | TGGTT{G}ACCCG  | rlmC | N      | D      | HM3t1                                                  |
| 908692   | T   | C   | TTTGG{C}GACCA  | poxB | T      | A      | H1t1                                                   |
| 914043   | A   | G   | CCCAC{G}ATCAG  | lysO | I      | I      | M2t2                                                   |
| 933928   | A   | G   | GCTTT{G}CTACT  | ftsK | Y      | C      | H3t1, H3t2                                             |
| 934688   | A   | G   | GTTGC{G}CCGCA  | ftsK | A      | A      | LM4t2                                                  |
| 934691   | G   | A   | GCACC{A}CAGCA  | ftsK | P      | P      | LM4t2                                                  |
| 934721   | A   | G   | CAACC{G}GTTCC  | ftsK | P      | P      | LM4t2                                                  |

Table 1: SNP Mutations (continued)

| position | ref | new | local sequence | gene   | ref AA | new AA | samples                                                                                                                            |
|----------|-----|-----|----------------|--------|--------|--------|------------------------------------------------------------------------------------------------------------------------------------|
| 934725   | C   | G   | CAGTT{G}CGCCG  | ftsK   | P      | A      | LM4t2                                                                                                                              |
| 936210   | G   | C   | AAGGT{C}GTGCG  | ftsK   | G      | R      | LM2t1                                                                                                                              |
| 946903   | A   | G   | GTATG{G}AATCG  | yczM   | K      | E      | Anc1                                                                                                                               |
| 960101   | A   | G   | GTTGA{G}GAAAC  | yczM   | K      | R      | M1t2                                                                                                                               |
| 965541   | T   | C   | GGCAG{C}AATAC  | yczM   | S      | S      | H1t1, H1t2                                                                                                                         |
| 966017   | A   | G   | TGGTA{G}AACAG  | msbA   | K      | R      | HM2t2                                                                                                                              |
| 985511   | T   | C   | TCAGC{C}TTTTT  | ompF   | K      | K      | M1t2                                                                                                                               |
| 988312   | G   | A   | AATTC{A}CAAAAT | None   | N/A    | N/A    | HM1t2                                                                                                                              |
| 990825   | A   | G   | CCGCG{G}TCAGG  | pepN   | D      | G      | M4t2                                                                                                                               |
| 999909   | T   | C   | TTTAA{C}GACGG  | elfC   | N      | N      | L3t2                                                                                                                               |
| 1007363  | A   | G   | TTTGA{G}TGACA  | rlmL   | N      | S      | M4t2                                                                                                                               |
| 1018258  | A   | G   | GTTAC{G}ACGTC  | ompA   | V      | V      | HM1t2                                                                                                                              |
| 1021005  | A   | G   | TGCAG{G}CGACC  | yccS   | R      | R      | H2t1, H2t2                                                                                                                         |
| 1034009  | C   | T   | CGGGG{T}GTTAG  | hyaB   | A      | V      | L1t1                                                                                                                               |
| 1041585  | A   | G   | GTGGC{G}CCTGA  | etk    | V      | A      | HM3t1                                                                                                                              |
| 1042617  | T   | C   | GGCGC{C}GTAAG  | etk    | Q      | R      | H3t2,<br>LM1t1,<br>M1t1, M1t2,<br>M2t1, M2t2                                                                                       |
| 1043334  | A   | T   | TGATA{T}TAAAC  | etk    | I      | N      | M1t2                                                                                                                               |
| 1048010  | A   | G   | GACCC{G}GAATG  | gfcB   | W      | R      | L1t1, L1t2                                                                                                                         |
| 1049705  | T   | A   | GGAGC{A}GCATG  | insB-4 | L      | Q      | M3t1                                                                                                                               |
| 1050464  | T   | A   | CGATA{A}TTAAG  | None   | N/A    | N/A    | M3t1                                                                                                                               |
| 1055424  | A   | T   | GTGAA{T}AAGGT  | None   | N/A    | N/A    | AncAgg,<br>H2t2,<br>H3t2, H4t1,<br>HM1t2,<br>HM4t1,<br>HM4t2,<br>L1t2, L3t1,<br>LM1t1,<br>LM3t1,<br>LM3t2,<br>LM4t2,<br>M3t1, M4t1 |
| 1058143  | A   | G   | GCAGC{G}GCAGG  | torC   | Q      | R      | Anc1                                                                                                                               |
| 1059652  | G   | A   | GTTCT{A}GCGGC  | torA   | L      | L      | L4t1                                                                                                                               |
| 1065934  | A   | G   | CGTTA{G}CCCTG  | agp    | T      | A      | HM4t2                                                                                                                              |
| 1070324  | G   | A   | AGGGC{A}GCATG  | rutD   | A      | A      | M2t1                                                                                                                               |
| 1084452  | C   | T   | GCCAA{T}GGCGC  | phoH   | N      | N      | H1t2, L2t1,<br>L2t2, L4t1,<br>L4t2,<br>LM3t1,<br>LM3t2,<br>LM4t1,<br>LM4t2,<br>M2t1, M4t1                                          |



Table 1: SNP Mutations (continued)

| position | ref | new | local sequence | gene | ref AA | new AA | samples                                                                                                                 |
|----------|-----|-----|----------------|------|--------|--------|-------------------------------------------------------------------------------------------------------------------------|
| 1086636  | A   | G   | AGCGC{G}ATGGC  | pgaC | I      | I      | HM4t1                                                                                                                   |
| 1096034  | G   | T   | CCGTT{T}GGGGC  | ycdU | W      | L      | HM2t1                                                                                                                   |
| 1096382  | C   | T   | CAATA{T}ACGAA  | None | N/A    | N/A    | Anc2, H1t1,<br>HM4t1,<br>L2t1,<br>LM2t1,<br>LM2t2,<br>M4t1                                                              |
| 1098407  | A   | G   | TCATG{G}GCCGG  | ycdX | E      | G      | H4t2                                                                                                                    |
| 1102382  | T   | C   | AACAA{C}AATGT  | csgD | L      | L      | HM1t1                                                                                                                   |
| 1110740  | A   | G   | CTGCA{G}CTGCT  | opgH | Q      | Q      | HM2t2                                                                                                                   |
| 1113717  | T   | C   | GTGTC{C}GTACG  | mdtG | Q      | R      | L3t1                                                                                                                    |
| 1115677  | A   | G   | TCCTA{G}TCCAC  | lpxL | L      | L      | HM1t2                                                                                                                   |
| 1119590  | A   | G   | GGGAG{G}GTTCA  | solA | L      | P      | L1t2                                                                                                                    |
| 1125098  | T   | A   | ATGCC{A}GCTAT  | rimJ | C      | S      | L3t1                                                                                                                    |
| 1125334  | G   | A   | CTGAC{A}GCATT  | rimJ | T      | T      | H1t2                                                                                                                    |
| 1128787  | T   | A   | TTGAT{A}CATTT  | flgN | N      | Y      | M1t1                                                                                                                    |
| 1129879  | A   | G   | CCCAC{G}GGCGG  | flgA | L      | P      | H2t1, H2t2                                                                                                              |
| 1131191  | G   | A   | ACTTT{A}CTGGT  | flgD | L      | L      | LM2t2                                                                                                                   |
| 1131522  | A   | T   | TGCGC{T}CCATT  | flgD | T      | S      | LM4t2                                                                                                                   |
| 1138673  | C   | T   | CGGTA{T}TGGCG  | flgK | L      | L      | LM3t1                                                                                                                   |
| 1140822  | C   | T   | CTGTT{T}AGTTA  | rne  | E      | K      | M4t1                                                                                                                    |
| 1142094  | A   | G   | CATGT{G}GCTTA  | rne  | Y      | H      | H1t2                                                                                                                    |
| 1142379  | G   | A   | ACGCG{A}ACAAA  | rne  | P      | S      | M2t1                                                                                                                    |
| 1142477  | G   | A   | TACGC{A}CACGG  | rne  | A      | V      | H2t1, H2t2                                                                                                              |
| 1142816  | T   | C   | CGGTG{C}ACAGT  | rne  | Y      | C      | H3t1, H3t2                                                                                                              |
| 1143263  | C   | T   | TGTTG{T}CGCGC  | rne  | G      | D      | H1t2                                                                                                                    |
| 1145043  | A   | G   | CGGGG{G}CCGGT  | rhuC | T      | A      | H4t1                                                                                                                    |
| 1145232  | A   | G   | GCAAA{G}AACTA  | None | N/A    | N/A    | L2t1                                                                                                                    |
| 1149105  | C   | T   | AGGGG{T}CAGCT  | fabD | P      | S      | H3t1, H3t2                                                                                                              |
| 1157332  | G   | A   | GCGCT{A}GCCGC  | ptsG | L      | L      | Anc2                                                                                                                    |
| 1162133  | T   | C   | TAAGA{C}GCTTG  | lpoB | M      | T      | HM2t1                                                                                                                   |
| 1170581  | T   | A   | GATAA{A}GGTTG  | mfd  | I      | F      | L4t1                                                                                                                    |
| 1171667  | A   | G   | CAGAT{G}CTCGC  | mfd  | Y      | H      | AncAgg,<br>Anc2,<br>Anc3, H3t1,<br>HM1t1,<br>HM4t1,<br>HM4t2,<br>L1t1, L1t2,<br>L2t1, L3t1,<br>LM4t1,<br>LM4t2,<br>M2t1 |
| 1173899  | G   | A   | GCAGC{A}CCAGA  | ycfT | A      | V      | HM1t1                                                                                                                   |
| 1178622  | T   | C   | CAGGC{C}GCCTC  | nagK | L      | P      | H3t2                                                                                                                    |
| 1179460  | G   | A   | GAAC{T}AATCT   | cobB | L      | L      | HM1t1                                                                                                                   |

Table 1: SNP Mutations (continued)

| position | ref | new | local sequence | gene      | ref AA | new AA | samples                       |
|----------|-----|-----|----------------|-----------|--------|--------|-------------------------------|
| 1183484  | G   | A   | TCAGC{A}CCATA  | potB      | A      | V      | M3t1                          |
| 1189447  | A   | G   | ACCAG{G}ATCGG  | phoP      | I      | I      | H1t2                          |
| 1190938  | G   | A   | ACGTC{A}TGGTT  | purB      | H      | H      | H1t1                          |
| 1191206  | T   | A   | ATAAT{A}CCATA  | purB      | E      | V      | H3t1                          |
| 1199668  | T   | C   | GCTCG{C}TCTCT  | intE      | E      | E      | HM4t1                         |
| 1203009  | T   | C   | CGTCG{C}GGCGT  | ymfL      | V      | A      | HM4t1                         |
| 1204592  | G   | A   | GGTCG{A}CAAAA  | ymfN—aaaE | G—NA   | D—NA   | HM2t1                         |
| 1205043  | A   | G   | GTATG{G}CACCT  | beeE      | D      | G      | M2t1, M2t2                    |
| 1207577  | G   | A   | CAGAT{A}CTTAT  | tfaP      | M      | I      | H3t1,<br>LM1t1,<br>M2t1, M2t2 |
| 1214605  | A   | G   | ACTGC{G}TGTTT  | bluF      | M      | T      | LM1t1                         |
| 1218400  | T   | C   | AAGAC{C}CGTCA  | ymgF      | L      | P      | LM4t1                         |
| 1225097  | C   | A   | GGTTG{A}CGAAA  | minC      | A      | S      | H1t2                          |
| 1226441  | A   | T   | GGATA{T}ATCAA  | pliG      | L      | I      | L3t2                          |
| 1230540  | C   | T   | TGAGG{T}AAAGG  | umuC      | A      | V      | L3t1, L3t2                    |
| 1243726  | A   | G   | GTTTC{G}GGAAC  | ycgR      | L      | P      | HM4t2                         |
| 1245001  | G   | T   | TTTCG{T}GCAGA  | treA      | P      | T      | LM3t1                         |
| 1245605  | G   | A   | GGTAC{A}ATGCT  | treA      | I      | I      | LM1t1,<br>LM1t2               |
| 1247518  | G   | A   | GGGTT{A}ATTTT  | dhaM      | S      | L      | M3t1                          |
| 1250815  | C   | T   | ATTTG{T}CGTTG  | dhaR      | P      | S      | L1t2                          |
| 1258477  | C   | T   | CATCC{T}TCGGG  | dauA      | E      | E      | HM4t1,<br>HM4t2               |
| 1261119  | C   | T   | GCATG{T}GTCCA  | None      | N/A    | N/A    | L2t2                          |
| 1261547  | A   | G   | TCTTT{G}AAAAT  | ispE      | F      | F      | L2t2                          |
| 1266471  | C   | T   | GCCTT{T}CCGCT  | ychQ      | F      | F      | LM1t1                         |
| 1270070  | A   | G   | GGCAC{G}GCACT  | chaA      | L      | P      | L4t1                          |
| 1277273  | A   | G   | GGTCA{G}CGTAT  | narK      | Q      | Q      | M1t2                          |
| 1289972  | C   | T   | ATTTC{T}CATTG  | rssB      | S      | S      | H1t1, L1t1,<br>L1t2           |
| 1295680  | A   | G   | AACCC{G}CATGA  | adhE      | W      | R      | LM3t1,<br>LM3t2               |
| 1311433  | A   | T   | GTAAA{T}CAAGA  | yciA      | V      | D      | M2t2                          |
| 1313476  | C   | T   | ACTGG{T}AGCGA  | ompW      | A      | V      | L3t1                          |
| 1319748  | G   | A   | ATATT{A}ATACT  | trpD      | I      | I      | HM2t1                         |
| 1321228  | C   | T   | GGCAT{T}ATACT  | trpE      | D      | N      | LM1t1,<br>LM1t2               |
| 1321436  | G   | A   | CCACC{A}AACTC  | trpE      | F      | F      | HM2t2                         |
| 1322560  | C   | T   | GGCAC{T}CTGGC  | yciV      | T      | T      | H4t2                          |
| 1322591  | G   | A   | CAGCT{A}CAATC  | yciV      | A      | T      | HM2t1                         |
| 1323753  | G   | T   | ACTTC{T}CTAAT  | yciO      | S      | S      | LM2t1                         |
| 1325074  | C   | T   | GGAGA{T}GCAAC  | yciQ      | R      | C      | H4t1, H4t2                    |
| 1328977  | T   | C   | CCGTC{C}GGAAA  | sohB      | L      | P      | M3t2                          |
| 1339023  | T   | C   | GGGGT{C}TGCCT  | pgpB      | F      | S      | L2t1                          |
| 1340236  | A   | G   | CTACC{G}GGCTA  | lapB      | Q      | R      | HM3t2                         |

Table 1: SNP Mutations (continued)

| position | ref | new | local sequence | gene | ref AA | new AA | samples                                                                                              |
|----------|-----|-----|----------------|------|--------|--------|------------------------------------------------------------------------------------------------------|
| 1344915  | T   | C   | AAACT{C}CAATT  | pdeR | E      | G      | L3t2                                                                                                 |
| 1348247  | C   | T   | TCCAG{T}CACAC  | yciW | G      | D      | H2t2                                                                                                 |
| 1354116  | C   | A   | GTTGG{A}GCAAC  | sapB | A      | A      | L3t2                                                                                                 |
| 1355103  | A   | G   | TCACC{G}CTTTT  | sapA | V      | A      | L1t2                                                                                                 |
| 1379848  | G   | A   | GCAGG{A}CTGGG  | ycjU | G      | G      | L3t1                                                                                                 |
| 1392711  | A   | G   | TGGAA{G}AGTAA  | mppA | K      | K      | L2t2                                                                                                 |
| 1394349  | C   | T   | ATGGC{T}GGGTG  | ynaI | P      | P      | HM1t2                                                                                                |
| 1400596  | A   | G   | AAAAA{G}GCAAT  | abgT | A      | A      | HM1t1                                                                                                |
| 1401188  | A   | G   | CCAGC{G}GCATT  | abgB | L      | P      | L3t2                                                                                                 |
| 1409840  | C   | T   | AACGC{T}GCCAG  | dbpA | P      | L      | L2t1                                                                                                 |
| 1423945  | G   | A   | TTCTT{A}CCAGC  | trkG | A      | T      | Anc2                                                                                                 |
| 1424342  | C   | T   | TA CTG{T}ATCGT | trkG | A      | V      | HM3t1                                                                                                |
| 1431317  | A   | G   | TCTAC{G}AACTC  | stfR | T      | T      | HM1t2                                                                                                |
| 1432890  | T   | C   | AAAAT{C}CGAGA  | pinR | R      | R      | HM1t1                                                                                                |
| 1433292  | A   | G   | CAGCC{G}TGATG  | ynaE | W      | R      | L1t2                                                                                                 |
| 1448456  | G   | A   | TCGGT{A}TTGTC  | tynA | N      | N      | H1t2                                                                                                 |
| 1453830  | A   | T   | CGTGG{T}TAACA  | paaA | D      | V      | M3t2                                                                                                 |
| 1464731  | T   | A   | CAATG{A}GACTT  | ydbA | None   | None   | HM3t2                                                                                                |
| 1465803  | G   | C   | CAGGC{C}GTTGT  | ydbA | None   | None   | H4t1, L4t2                                                                                           |
| 1472562  | C   | T   | CGTCT{T}GATGG  | ydbA | None   | None   | HM3t1                                                                                                |
| 1482451  | A   | G   | TGACC{G}GGCGG  | hrpA | Q      | R      | M2t2                                                                                                 |
| 1487171  | A   | T   | CGTTG{T}TTTTT  | ydcF | D      | V      | HM1t2                                                                                                |
| 1487919  | C   | T   | CTTCC{T}GTTCT  | aldA | P      | L      | LM1t1,<br>LM1t2                                                                                      |
| 1493161  | A   | G   | TGGAT{G}AGGTG  | trg  | K      | E      | HM3t1,<br>HM3t2                                                                                      |
| 1502259  | C   | T   | AATAA{T}GAAAG  | ydcL | N      | N      | LM3t1                                                                                                |
| 1510704  | T   | C   | ACTCC{C}TGACT  | None | N/A    | N/A    | LM2t1                                                                                                |
| 1515178  | A   | T   | TGAAT{T}TCTTG  | patD | Y      | F      | LM4t2                                                                                                |
| 1517385  | T   | C   | ATGCC{C}TGTTT  | ydcZ | Q      | Q      | HM4t1,<br>HM4t2                                                                                      |
| 1521740  | T   | C   | GCCCG{C}TGCTT  | yncD | T      | A      | HM1t2                                                                                                |
| 1522866  | G   | A   | AGCGC{A}GTCAC  | yncE | A      | A      | H4t1                                                                                                 |
| 1531522  | G   | A   | AACAT{A}CTGGA  | ydcC | M      | I      | H2t1                                                                                                 |
| 1532308  | T   | C   | CCGCG{C}GAACT  | pptA | R      | R      | M4t2                                                                                                 |
| 1536328  | A   | G   | CGAAC{G}GCAGC  | narW | L      | P      | H2t2                                                                                                 |
| 1541878  | A   | G   | GTTGT{G}CATCA  | None | N/A    | N/A    | AncAgg,<br>Anc2, Anc3,<br>H3t1, H3t2,<br>HM2t1,<br>HM3t1,<br>HM3t2,<br>L3t1,<br>LM1t1,<br>M1t1, M3t2 |
| 1547070  | A   | G   | AAAGA{G}CGAGC  | fdnG | N      | S      | H4t1, H4t2                                                                                           |
| 1554242  | T   | A   | AGTGA{A}ACGCG  | maeA | I      | F      | H2t1                                                                                                 |

Table 1: SNP Mutations (continued)

| position | ref | new | local sequence | gene | ref AA | new AA | samples                                                          |
|----------|-----|-----|----------------|------|--------|--------|------------------------------------------------------------------|
| 1567655  | A   | G   | ATCTT{G}CCGGT  | yddW | G      | G      | M3t2                                                             |
| 1569225  | A   | G   | AGGAT{G}CCGGC  | gadC | G      | G      | M3t1, M3t2                                                       |
| 1587720  | A   | G   | TTTCT{G}TACCC  | ydeS | I      | T      | LM4t2                                                            |
| 1588462  | G   | A   | ATTCT{A}TCGCA  | ydeT | T      | I      | L3t2                                                             |
| 1588964  | T   | C   | TATAT{C}ATTGG  | ydeT | N      | D      | H4t2                                                             |
| 1589442  | T   | C   | AAGTG{C}CAGGA  | None | N/A    | N/A    | H3t1, H3t2,<br>HM2t2,<br>LM1t1,<br>LM4t2,<br>M1t1, M1t2,<br>M2t1 |
| 1591894  | A   | G   | TTACC{G}GCTAT  | yneO | None   | None   | H4t1                                                             |
| 1595135  | G   | A   | GGTCA{A}GAGGC  | yneO | None   | None   | HM2t1                                                            |
| 1597156  | A   | G   | CCAGC{G}AAACA  | yneO | None   | None   | LM2t1                                                            |
| 1597226  | T   | C   | CGATG{C}TTTAC  | yneO | None   | None   | H1t2                                                             |
| 1605498  | G   | A   | ACCAT{A}GTTAT  | lsrF | G      | S      | M3t2                                                             |
| 1610992  | C   | T   | CGCGG{T}AGCAC  | dgcF | L      | L      | H1t2                                                             |
| 1611147  | T   | C   | GCAAA{C}AAAGG  | None | N/A    | N/A    | M2t1                                                             |
| 1612401  | T   | C   | GCGAC{C}TTACC  | glsB | K      | K      | H1t1                                                             |
| 1613303  | T   | C   | CACCG{C}GACAG  | sad  | T      | A      | H1t2                                                             |
| 1619361  | A   | G   | TTTAA{G}TCACA  | marB | N      | S      | M3t2                                                             |
| 1622274  | T   | A   | GCTCT{A}CCAAT  | dgcZ | G      | G      | M1t2                                                             |
| 1630883  | C   | T   | TGGAA{T}ATGCT  | ydfJ | M      | I      | LM1t1,<br>LM1t2                                                  |
| 1636309  | A   | G   | GATAA{G}GTTCG  | ydfO | K      | K      | HM2t2, L3t2                                                      |
| 1639510  | T   | C   | CTTTG{C}CCTGT  | ydfR | D      | G      | H1t2                                                             |
| 1641157  | C   | T   | ATGGT{T}GTATC  | cspF | R      | C      | LM3t1,<br>LM3t2                                                  |
| 1649004  | A   | G   | TGCCA{G}AAGGA  | dicB | K      | E      | L1t1, L1t2,<br>LM2t1                                             |
| 1659157  | C   | G   | TGTCG{G}CTACA  | ynfE | A      | G      | H3t1                                                             |
| 1660144  | T   | C   | GCGCG{C}CGGCA  | ynfF | V      | A      | H3t2                                                             |
| 1661850  | T   | C   | CGGGC{C}TCCAT  | ynfF | F      | L      | H4t1, H4t2                                                       |
| 1664429  | A   | G   | CTTAA{G}GCACG  | None | N/A    | N/A    | LM3t1                                                            |
| 1680556  | G   | A   | CATGC{A}CTGGA  | folM | A      | A      | HM2t2                                                            |
| 1688871  | C   | T   | CTCAG{T}AGTTA  | manA | Q      | *      | L3t1                                                             |
| 1689250  | A   | G   | ATCAA{G}ACTAT  | ydgA | N      | D      | H1t1                                                             |
| 1694805  | A   | T   | TAAAG{T}AATCA  | uidA | F      | Y      | HM4t1                                                            |
| 1707886  | C   | G   | CAGAA{G}AACAG  | rsxC | Q      | E      | L1t2                                                             |
| 1717152  | A   | G   | CGGGA{G}GATCG  | pdxH | L      | P      | HM1t1                                                            |
| 1717795  | T   | C   | GGTAA{C}CCCGC  | anmK | G      | G      | LM2t2                                                            |
| 1721232  | G   | A   | CTAAC{A}TCCCC  | ydhJ | V      | I      | LM2t1                                                            |
| 1724100  | A   | G   | TGGTA{G}ACGTA  | ydhF | L      | L      | H2t1, H2t2                                                       |
| 1725744  | G   | A   | GCACT{A}TGGCT  | nemR | L      | L      | L1t1                                                             |

Table 1: SNP Mutations (continued)

| position | ref | new | local sequence | gene | ref AA | new AA | samples                                                                                              |
|----------|-----|-----|----------------|------|--------|--------|------------------------------------------------------------------------------------------------------|
| 1733676  | T   | C   | AACCG{C}ATTTTC | mepH | R      | R      | AncAgg,<br>Anc1,<br>Anc2, H1t1,<br>HM4t1,<br>LM2t1,<br>LM4t1,<br>LM4t2,<br>M3t1, M3t2,<br>M4t1, M4t2 |
| 1747619  | A   | T   | TAATG{T}GTCGC  | ydhS | E      | V      | Anc3                                                                                                 |
| 1750475  | T   | C   | TGCGC{C}TCCTG  | ydhW | E      | E      | HM4t1                                                                                                |
| 1754916  | A   | G   | CTAAG{G}CTGTC  | None | N/A    | N/A    | H3t1, H3t2                                                                                           |
| 1755400  | T   | C   | GAACC{C}GCCTG  | pykF | L      | P      | H3t2,<br>LM1t1,<br>M1t1, M1t2,<br>M2t2                                                               |
| 1755507  | A   | G   | TTCGT{G}AGCGT  | pykF | K      | E      | H2t1                                                                                                 |
| 1758364  | A   | G   | CTGAC{G}GCCCT  | sufE | C      | R      | H2t1, H2t2                                                                                           |
| 1759215  | C   | T   | CTGTG{T}CAAGC  | sufS | G      | D      | L4t1,<br>LM2t1,<br>LM2t2                                                                             |
| 1759381  | G   | A   | GTGGT{A}CTCCA  | sufS | H      | Y      | H3t1                                                                                                 |
| 1760934  | G   | A   | TGCTT{A}CGGGG  | sufD | Q      | *      | HM2t1,<br>L2t1, L2t2,<br>L4t1, L4t2,<br>LM4t1,<br>LM4t2,<br>M2t1, M2t2                               |
| 1761133  | T   | C   | GTGCG{C}AACAA  | sufC | T      | A      | H4t2                                                                                                 |
| 1761219  | T   | C   | CGGAG{C}CCGAC  | sufC | D      | G      | HM1t2                                                                                                |
| 1761225  | T   | C   | CCGAC{C}CATCA  | sufC | E      | G      | L1t1, L1t2                                                                                           |
| 1761840  | C   | T   | AGAAA{T}CGTTA  | sufB | G      | D      | H4t1, H4t2                                                                                           |
| 1762024  | G   | A   | GCACT{A}AGTGA  | sufB | Q      | *      | H3t1                                                                                                 |
| 1762267  | A   | G   | CGCTG{G}CCCGG  | sufB | S      | P      | H1t1                                                                                                 |
| 1762291  | A   | G   | CCATG{G}CATTT  | sufB | S      | P      | H1t2                                                                                                 |
| 1762299  | C   | T   | TTTTG{T}TGTTT  | sufB | S      | N      | HM2t2                                                                                                |
| 1762315  | A   | G   | TTCGC{G}CAAAG  | sufB | C      | R      | H3t1                                                                                                 |
| 1762497  | C   | T   | CGTAG{T}TGTCT  | sufB | S      | N      | HM3t1,<br>HM3t2                                                                                      |
| 1762620  | T   | C   | TACCA{C}CAGAG  | sufB | D      | G      | HM4t1                                                                                                |
| 1770420  | G   | A   | GCCGC{A}GGTGT  | ydiM | A      | A      | LM1t1,<br>LM1t2                                                                                      |
| 1774119  | G   | T   | CGTGA{T}ACCAT  | aroD | E      | D      | H3t1                                                                                                 |
| 1775493  | A   | G   | GCAGA{G}AATGG  | ydiF | K      | R      | H2t1                                                                                                 |
| 1776994  | G   | A   | GCCCG{A}CATTA  | ydiO | G      | D      | L2t2                                                                                                 |
| 1782686  | G   | A   | CCGCT{A}CAAAA  | fadK | L      | L      | LM3t2                                                                                                |
| 1784108  | T   | C   | CCCTG{C}TTCTT  | ppsA | K      | K      | H2t2                                                                                                 |

Table 1: SNP Mutations (continued)

| position | ref | new | local sequence | gene | ref AA | new AA | samples                                                                                                                                |
|----------|-----|-----|----------------|------|--------|--------|----------------------------------------------------------------------------------------------------------------------------------------|
| 1793841  | A   | T   | CCATC{T}TCCAG  | btuC | M      | K      | LM4t1                                                                                                                                  |
| 1794785  | T   | C   | TTCAA{C}CCCTC  | pheT | D      | G      | LM2t1                                                                                                                                  |
| 1794880  | T   | C   | GTATC{C}TGCAG  | pheT | Q      | Q      | LM2t2                                                                                                                                  |
| 1796824  | A   | G   | CCTTC{G}GACGG  | pheT | S      | S      | M1t1                                                                                                                                   |
| 1798515  | A   | G   | TTGGT{G}CTCTT  | None | N/A    | N/A    | Anc2, H3t1,<br>LM1t1,<br>LM4t2,<br>M1t1, M1t2,<br>M2t1, M2t2                                                                           |
| 1802486  | A   | T   | GTGTT{T}CTCAG  | arpB | None   | None   | LM1t2                                                                                                                                  |
| 1808326  | T   | C   | ATGCC{C}TCCTT  | yniB | E      | E      | L1t1                                                                                                                                   |
| 1808454  | T   | A   | ATACG{A}CATGA  | yniB | T      | S      | M2t1                                                                                                                                   |
| 1809175  | T   | C   | CGTCG{C}TCCTG  | hxpB | V      | A      | H1t1                                                                                                                                   |
| 1814500  | G   | A   | TGGCC{A}CGCGA  | katE | P      | P      | H1t2                                                                                                                                   |
| 1816006  | T   | C   | GTAGG{C}TTGCG  | chbG | K      | K      | H1t2                                                                                                                                   |
| 1824412  | C   | T   | TCTGT{T}AGACG  | spy  | L      | L      | H3t1                                                                                                                                   |
| 1826028  | C   | T   | GGTGG{T}GTAA   | astE | T      | T      | H3t1, H3t2,<br>LM1t1                                                                                                                   |
| 1828086  | G   | A   | GCATC{A}CCCTG  | astD | G      | G      | H3t1                                                                                                                                   |
| 1834117  | T   | C   | GGCGC{C}GCTTC  | ydjZ | L      | P      | H1t2                                                                                                                                   |
| 1837451  | G   | T   | GGAAT{T}GGGGC  | ynjC | W      | L      | HM3t1                                                                                                                                  |
| 1837452  | G   | C   | GAATG{C}GGGCC  | ynjC | W      | C      | HM3t1                                                                                                                                  |
| 1837453  | G   | C   | AATGG{C}GGCCA  | ynjC | G      | R      | HM3t1                                                                                                                                  |
| 1837454  | G   | A   | ATGGG{A}GCCAC  | ynjC | G      | E      | HM3t1                                                                                                                                  |
| 1851805  | T   | C   | ACACG{C}CAGTG  | None | N/A    | N/A    | AncAgg,<br>Anc2,<br>Anc3, H3t1,<br>H3t2, H4t2,<br>L1t2, L2t1,<br>L2t2, L3t1,<br>LM1t1,<br>LM2t1,<br>M1t1, M1t2,<br>M2t1, M2t2,<br>M4t1 |
| 1864546  | A   | G   | AGATA{G}TCAGT  | yeaE | D      | D      | M2t1                                                                                                                                   |
| 1874712  | T   | C   | TTAAC{C}CATCC  | nimR | E      | G      | H2t1, H2t2                                                                                                                             |
| 1882652  | T   | A   | CCTAC{A}CTTTC  | yeaV | S      | T      | Anc3                                                                                                                                   |
| 1897017  | G   | A   | CCAAC{A}GTGCC  | sdaA | G      | S      | L4t1, L4t2                                                                                                                             |
| 1903490  | G   | T   | TTCTG{T}GGAAC  | manZ | W      | C      | LM3t2                                                                                                                                  |
| 1908970  | A   | G   | TAAAC{G}ATACT  | kdgR | I      | I      | H4t1                                                                                                                                   |
| 1919698  | G   | A   | GCATT{A}CCATT  | rsmF | L      | L      | H2t1, H2t2                                                                                                                             |
| 1924839  | C   | T   | TCCTG{T}CCCAC  | yobB | A      | V      | H4t1                                                                                                                                   |
| 1930839  | A   | G   | CTTGA{G}CGTGC  | purT | E      | E      | HM2t1                                                                                                                                  |
| 1932428  | G   | A   | TCGCG{A}TCCAG  | edd  | D      | D      | LM4t1,<br>LM4t2                                                                                                                        |
| 1933227  | T   | C   | CCACT{C}TACCT  | edd  | K      | R      | M4t1                                                                                                                                   |

Table 1: SNP Mutations (continued)

| position | ref | new | local sequence | gene      | ref AA | new AA | samples                                                      |
|----------|-----|-----|----------------|-----------|--------|--------|--------------------------------------------------------------|
| 1940720  | G   | A   | CAATT{A}GCGTG  | mepM      | P      | L      | HM1t1                                                        |
| 1949195  | T   | C   | TTACC{C}TTGTG  | aspS      | K      | K      | H2t1                                                         |
| 1949906  | A   | T   | TCGTT{T}CCACT  | None      | N/A    | N/A    | LM4t1                                                        |
| 1958386  | G   | C   | GTAA{C}CCCC    | cutC      | G      | G      | HM2t1,<br>L2t1, L2t2,<br>L4t1, L4t2,<br>LM4t2,<br>M2t1, M2t2 |
| 1958409  | A   | G   | TGCGC{G}TAATT  | cutC      | C      | R      | L2t1                                                         |
| 1962573  | G   | T   | GCTTT{T}GATGG  | flhA      | Q      | K      | HM2t1                                                        |
| 1963357  | A   | G   | ATTCC{G}GGCAC  | flhA      | P      | P      | LM2t2                                                        |
| 1964459  | T   | A   | AGCGC{A}CGCGC  | flhB      | R      | R      | HM1t1                                                        |
| 1970770  | A   | G   | GCTTC{G}ACCGC  | tar       | V      | V      | H1t1                                                         |
| 1973256  | C   | T   | TTTGC{T}AGAAT  | cheA      | L      | L      | HM2t1                                                        |
| 1980049  | C   | T   | CCAGC{T}GTTCG  | otsA      | R      | Q      | H4t1                                                         |
| 1980833  | T   | G   | ACGAC{G}CATAG  | otsA—otsB | S—E    | R—A    | M3t1                                                         |
| 1982220  | G   | A   | GACAC{A}CGACG  | araH      | A      | V      | H3t1                                                         |
| 1984087  | C   | T   | ATTTC{T}TGCCC  | araG      | Q      | Q      | H1t2                                                         |
| 1985491  | T   | C   | AATTC{C}CCATA  | None      | N/A    | N/A    | L1t1                                                         |
| 1986859  | A   | T   | ACTGG{T}CATTT  | yecJ      | S      | T      | L2t1                                                         |
| 1997804  | G   | C   | TTTCT{C}ACTGA  | dcyD      | Q      | E      | L3t1                                                         |
| 2016115  | G   | A   | GCTCG{A}TCCGG  | fliI      | G      | D      | M2t2                                                         |
| 2032442  | T   | C   | ACCAG{C}GCCCC  | yedR      | A      | A      | H4t1                                                         |
| 2036054  | A   | G   | ACATT{G}TGCTT  | hprS      | H      | H      | H3t1                                                         |
| 2040319  | G   | A   | AGCAG{A}TTCAC  | msrQ      | V      | I      | HM4t1                                                        |
| 2046004  | G   | T   | TGAAT{T}GTGTG  | yeeJ      | G      | C      | HM2t2                                                        |
| 2050483  | G   | A   | CTAAC{A}TGCCC  | yeeJ      | V      | M      | HM3t2                                                        |
| 2051027  | A   | T   | TTTAA{T}CCACT  | yeeJ      | N      | I      | LM2t1                                                        |
| 2051314  | T   | C   | GCCCT{C}CTCTC  | None      | N/A    | N/A    | H1t2                                                         |
| 2052134  | A   | G   | CAACA{G}CCTGA  | yeeL      | None   | None   | HM4t2                                                        |
| 2053533  | G   | A   | AGTCC{A}CGGAA  | shiA      | A      | T      | HM4t1                                                        |
| 2064100  | G   | A   | TCAAT{A}CCAGA  | cobS      | A      | V      | M1t1                                                         |
| 2064115  | G   | T   | CGTGG{T}TGCCT  | cobS      | T      | N      | L3t1                                                         |
| 2066524  | C   | T   | TGTTC{T}ATGGC  | insH-6    | G      | R      | L1t1, L1t2                                                   |
| 2068110  | A   | G   | CCCGG{G}GTAGA  | yoeA      | None   | None   | HM1t1                                                        |
| 2071302  | T   | C   | CCCGG{C}ACAGT  | flu       | G      | G      | HM2t2                                                        |
| 2072378  | A   | G   | CCTGA{G}GCTGA  | flu       | K      | R      | HM3t1                                                        |
| 2073165  | C   | T   | GCTGG{T}CATTC  | flu       | G      | G      | L3t1                                                         |
| 2077570  | A   | G   | CGATA{G}TAATG  | None      | N/A    | N/A    | HM3t1                                                        |
| 2093878  | T   | C   | GCCGA{C}AAACT  | hisH      | D      | D      | HM4t2                                                        |
| 2097893  | C   | T   | GAAGA{T}GCACG  | ugd       | A      | A      | HM2t1                                                        |
| 2132138  | T   | C   | CCAGG{C}AAAGA  | wcaA      | T      | A      | HM2t1,<br>HM2t2                                              |
| 2146178  | A   | C   | TTGTC{C}TTGGT  | alkA      | M      | R      | LM1t2                                                        |
| 2158305  | T   | C   | ACCAA{C}GATGA  | mdtC      | N      | N      | H4t1, H4t2                                                   |
| 2164095  | G   | A   | CGACC{A}CACCA  | baeR      | R      | H      | L2t1                                                         |

Table 1: SNP Mutations (continued)

| position | ref | new | local sequence | gene | ref AA | new AA | samples      |
|----------|-----|-----|----------------|------|--------|--------|--------------|
| 2171560  | C   | T   | GACAG{T}GCACT  | gatD | A      | T      | Anc3         |
| 2172047  | G   | A   | ATGAC{A}CTTTC  | gatD | S      | S      | H1t2         |
| 2176354  | A   | G   | TTGTG{G}ATATT  | gatY | I      | I      | L1t2         |
| 2200828  | T   | C   | ACAGC{C}CCACG  | yehI | A      | A      | Anc3         |
| 2207340  | T   | C   | GATCC{C}GAACG  | yehP | P      | P      | HM2t2        |
| 2215488  | G   | A   | ATTCC{A}GCACC  | yehW | A      | A      | H4t2         |
| 2218867  | G   | A   | CGAGC{A}CCTTA  | None | N/A    | N/A    | L1t1, L1t2   |
| 2222123  | A   | G   | CCGAC{G}CGCCC  | dld  | T      | A      | H4t1, H4t2   |
| 2240931  | T   | C   | CTGCT{C}GCTGG  | None | N/A    | N/A    | HM3t1        |
| 2250158  | T   | C   | CTTGT{C}CACCA  | nfo  | F      | S      | H2t1         |
| 2256774  | A   | G   | CCAGC{G}GGAAT  | psuG | L      | P      | HM1t2        |
| 2257536  | T   | C   | AAGCG{C}CCTGC  | psuG | D      | G      | HM4t2        |
| 2260372  | T   | C   | CAGTG{C}AAGGT  | fruA | Y      | C      | L4t1, L4t2   |
| 2269906  | T   | A   | CATTG{A}TATCT  | None | N/A    | N/A    | HM3t2        |
| 2271476  | G   | A   | CGCTG{A}CTAAA  | pdeN | W      | *      | HM4t1, HM4t2 |
| 2280299  | G   | A   | CTGGG{A}CTGAC  | radD | G      | G      | LM3t2        |
| 2281074  | T   | C   | AACAC{C}TTGGT  | radD | F      | L      | H3t1, H3t2   |
| 2281704  | G   | A   | TGCTG{A}GTCGC  | None | N/A    | N/A    | LM1t1, LM1t2 |
| 2297921  | T   | C   | CGCTT{C}CTTCA  | napB | K      | E      | LM1t1        |
| 2303747  | G   | C   | GTGCG{C}CACCC  | None | N/A    | N/A    | LM3t1        |
| 2304022  | T   | C   | CAACG{C}CCGAG  | None | N/A    | N/A    | LM3t1        |
| 2304237  | A   | G   | CATCC{G}ACATC  | None | N/A    | N/A    | L2t1         |
| 2316529  | C   | T   | ATCGA{T}GCCAT  | rcsC | V      | I      | LM4t1        |
| 2317441  | C   | T   | GTTGG{T}GGTGA  | rcsC | A      | T      | L1t1         |
| 2320280  | A   | G   | TTTCC{G}GGTCG  | atoS | P      | P      | M2t1         |
| 2324306  | T   | A   | GCTTG{A}GTCAT  | atoE | C      | *      | H3t1         |
| 2325563  | A   | G   | GCAGA{G}ACGGT  | atoB | E      | E      | LM4t2        |
| 2327829  | G   | A   | CGCCT{A}CATAG  | yfaQ | A      | V      | H2t2         |
| 2342000  | A   | T   | CAACG{T}CTATA  | yfaL | V      | D      | HM1t1        |
| 2351015  | A   | G   | CGCAG{G}AAGCA  | glpT | F      | S      | M4t2         |
| 2354267  | A   | C   | GCAAA{C}CCAGT  | glpB | N      | T      | L3t2         |
| 2354670  | A   | G   | CAGGG{G}TGCGG  | glpB | G      | G      | HM3t1        |
| 2355840  | G   | A   | TGGTG{A}TCACC  | glpC | V      | I      | HM4t1        |
| 2366884  | A   | G   | CATTG{G}AATTC  | arnC | E      | G      | HM3t2        |
| 2367300  | G   | A   | GGGAT{A}CCTCG  | arnA | C      | Y      | HM2t1        |
| 2372877  | G   | A   | TTATT{A}CTGAC  | menE | Q      | *      | H3t2         |
| 2378050  | G   | A   | AACGT{A}CGGGG  | menD | A      | V      | H2t2         |
| 2378375  | A   | T   | CGTTA{T}CGGTG  | menD | L      | I      | HM1t1        |
| 2390826  | A   | T   | GATAG{T}AGCCC  | nuoM | F      | Y      | HM3t1        |
| 2393761  | G   | A   | CGAAC{A}CTTTC  | nuoL | A      | V      | H4t1, H4t2   |
| 2399156  | G   | A   | CAATG{A}AAATA  | nuoG | S      | F      | H1t2         |
| 2408904  | C   | T   | GGATG{T}TGCCA  | yfbS | A      | T      | M1t2         |
| 2409678  | G   | A   | AAATT{A}CCGGA  | yfbS | Q      | *      | HM4t2        |



Table 1: SNP Mutations (continued)

| position | ref | new | local sequence | gene | ref AA | new AA | samples         |
|----------|-----|-----|----------------|------|--------|--------|-----------------|
| 2417269  | T   | C   | ATGGG{C}CTGGT  | yfcC | G      | G      | HM2t1           |
| 2425208  | G   | A   | AGCGG{A}CTTTC  | None | N/A    | N/A    | H4t1            |
| 2434069  | C   | G   | GCGGG{G}CCATT  | truA | G      | A      | H1t2            |
| 2454634  | A   | G   | CTTGC{G}GGCGA  | yfcV | L      | P      | M1t2            |
| 2460210  | T   | C   | GGATA{C}TTTAC  | None | N/A    | N/A    | HM3t2           |
| 2461563  | C   | T   | GAAGG{T}TTTAA  | fadL | G      | G      | LM3t2           |
| 2461813  | T   | C   | ACCAG{C}TCGAG  | fadL | F      | L      | H2t1            |
| 2463696  | C   | T   | ATCGG{T}CAGGT  | m1aA | W      | *      | LM2t1           |
| 2466705  | A   | G   | ATCAA{G}CAAAT  | intS | K      | K      | HM4t1           |
| 2467320  | G   | A   | CTGTT{A}GATGG  | yfdG | G      | R      | H2t1            |
| 2467832  | A   | G   | GAAAA{G}CGGCT  | yfdH | T      | A      | HM1t1           |
| 2476015  | G   | A   | TGATG{A}CATTT  | dsdC | C      | C      | H4t2            |
| 2499448  | G   | A   | AATTG{A}CCTGC  | ypdA | G      | D      | HM2t2           |
| 2506925  | A   | G   | CTATA{G}GCAAT  | fryC | A      | A      | H1t1            |
| 2516236  | G   | A   | AGAAG{A}CAAAG  | pdeA | C      | C      | LM3t2           |
| 2523843  | T   | A   | AAATG{A}CCGCG  | xapA | G      | G      | LM2t2           |
| 2539647  | C   | T   | CGATC{T}GCCAG  | cysA | A      | A      | H3t1            |
| 2548088  | C   | T   | ATTGC{T}GCCAC  | yfeW | A      | A      | H1t1            |
| 2549311  | T   | C   | ACGCG{C}CTCTT  | yfeX | T      | A      | LM4t1,<br>LM4t2 |
| 2551752  | T   | C   | CGTTG{C}TCTCG  | amiA | V      | A      | HM1t2           |
| 2555773  | C   | T   | GTGGT{T}GCCAT  | eutC | A      | A      | M1t2            |
| 2564439  | A   | G   | CGTTG{G}ACAGG  | yffS | E      | G      | H4t1            |
| 2581142  | T   | C   | AATGT{C}GCGTT  | ypfG | A      | A      | HM2t1           |
| 2581606  | T   | C   | TAAGG{C}GATTG  | ypfG | T      | A      | HM3t2           |
| 2585052  | G   | T   | CTCTG{T}CGAGC  | narQ | A      | S      | H4t2            |
| 2587424  | T   | C   | AGATG{C}CACTG  | acrD | V      | A      | H4t1, H4t2      |
| 2588051  | T   | C   | CGTGG{C}GGTGG  | acrD | V      | A      | H4t1            |
| 2593691  | T   | C   | CCGGA{C}GAACT  | tmcA | H      | R      | Anc3            |
| 2594217  | G   | A   | GCCCT{A}CACCG  | tmcA | Q      | *      | H1t2            |
| 2595081  | T   | C   | AGCCA{C}CCCTG  | tmcA | M      | M      | L1t1            |
| 2600878  | G   | A   | TTCTT{A}CCAGA  | hyfA | L      | L      | M2t1, M2t2      |
| 2605345  | T   | C   | CGTTG{C}GCCTG  | hyfD | V      | A      | H3t2            |
| 2610612  | C   | T   | GGTTG{T}GCGAT  | hyfI | R      | C      | M4t2            |
| 2621016  | A   | G   | GCAAA{G}TTCTT  | purM | I      | V      | H1t1            |
| 2622769  | T   | C   | ATCCG{C}TACGC  | ppk  | R      | R      | Anc2            |
| 2624773  | G   | A   | TGGCG{A}CGGAT  | ppx  | G      | D      | M2t1            |
| 2636060  | G   | A   | TCTTC{A}TCGAC  | der  | D      | D      | Anc1            |
| 2636650  | A   | G   | GGAAA{G}CGGCC  | None | N/A    | N/A    | HM1t1           |
| 2641177  | T   | C   | CAATT{C}TCAGT  | rodZ | K      | R      | H2t2            |
| 2642052  | G   | A   | TGCGT{A}GCTTC  | rodZ | A      | A      | M1t1            |
| 2642325  | A   | T   | GGTAC{T}TAAAG  | None | N/A    | N/A    | M4t1            |
| 2642327  | A   | T   | TACAT{T}AAGTA  | None | N/A    | N/A    | M4t1            |
| 2642329  | A   | T   | CATAA{T}GTAAC  | None | N/A    | N/A    | M4t1            |
| 2643333  | T   | C   | TCTCA{C}CAAAG  | rlmN | D      | G      | M3t1            |
| 2644923  | G   | A   | CGGGC{A}TGCCG  | pbpC | T      | M      | M4t1            |

Table 1: SNP Mutations (continued)

| position | ref | new | local sequence | gene | ref AA | new AA | samples                                                                                             |
|----------|-----|-----|----------------|------|--------|--------|-----------------------------------------------------------------------------------------------------|
| 2671673  | C   | G   | GCCGC{G}AGACT  | hcaD | A      | A      | Anc1                                                                                                |
| 2672417  | A   | G   | GGCAA{G}ACGTT  | hcaD | K      | K      | LM3t2                                                                                               |
| 2672706  | G   | A   | ATATG{A}CCTCG  | yphA | A      | T      | HM1t2                                                                                               |
| 2678885  | T   | C   | ACAAG{C}CAGGT  | yphG | D      | G      | H1t1, L1t1, L1t2                                                                                    |
| 2691544  | G   | A   | AGCAG{A}TCACT  | purL | D      | D      | HM2t1                                                                                               |
| 2696122  | T   | C   | TAAAG{C}GCCGG  | mltF | V      | A      | H3t1                                                                                                |
| 2698580  | T   | A   | GCAGA{A}GAGAT  | yfhH | D      | E      | H3t2                                                                                                |
| 2700319  | T   | C   | TTCAG{C}TCATG  | pdxJ | E      | E      | H4t2                                                                                                |
| 2700658  | A   | G   | TCCTG{G}CGCTT  | pdxJ | R      | R      | H1t1                                                                                                |
| 2701619  | A   | G   | CGTGA{G}GACGT  | recO | F      | L      | H2t2                                                                                                |
| 2709406  | A   | G   | AGTCT{G}CAGAA  | None | N/A    | N/A    | M4t2                                                                                                |
| 2710010  | A   | G   | GGTGG{G}CATAG  | nadB | G      | G      | L3t1                                                                                                |
| 2710594  | C   | T   | GCCCG{T}CGATT  | nadB | A      | V      | HM1t1                                                                                               |
| 2721390  | T   | C   | ACAAC{C}TCAGC  | patZ | L      | P      | M2t2                                                                                                |
| 2723932  | G   | A   | GCAGG{A}CACAC  | kgtP | A      | V      | HM3t2                                                                                               |
| 2724431  | C   | T   | CACGA{T}AACCA  | kgtP | V      | I      | H2t2                                                                                                |
| 2725399  | G   | T   | GCTAC{T}GCCGC  | rrfG | None   | None   | HM4t2                                                                                               |
| 2742700  | A   | G   | GCATT{G}CACCC  | dgcN | Y      | C      | H1t2                                                                                                |
| 2744372  | G   | A   | ACCGC{A}GTTAC  | rplS | R      | C      | HM4t1, HM4t2                                                                                        |
| 2746434  | A   | G   | CGATT{G}GCGAC  | ffh  | *      | Q      | M3t2                                                                                                |
| 2747257  | G   | A   | AGTTT{A}GCTTC  | ffh  | A      | A      | AncAgg, Anc1, Anc2, Anc3, H3t2, H4t1, L1t2, L2t1, LM1t1, LM2t1, LM4t1, M1t1, M1t2, M2t1, M2t2, M4t1 |
| 2752895  | G   | A   | ACAAC{A}CCAGC  | recN | R      | H      | H4t1, H4t2                                                                                          |
| 2754230  | T   | A   | CAGCG{A}CACTC  | yjfF | T      | S      | LM1t2                                                                                               |
| 2754231  | C   | G   | AGCGT{G}ACTCG  | yjfF | V      | V      | LM1t2                                                                                               |
| 2754232  | A   | T   | GCGTC{T}CTCGC  | yjfF | V      | E      | LM1t2                                                                                               |
| 2754233  | C   | G   | CGTCA{G}TCGCT  | yjfF | V      | L      | LM1t2                                                                                               |
| 2754234  | T   | A   | GTCAC{A}CGCTG  | yjfF | R      | R      | LM1t2                                                                                               |
| 2754368  | A   | G   | GACCA{G}AGGCG  | ratA | F      | S      | HM4t1                                                                                               |
| 2764185  | T   | A   | TTCAA{A}GAATG  | abpA | I      | F      | HM1t1, HM1t2                                                                                        |
| 2769253  | G   | A   | CACCA{A}CCGGT  | yjfQ | Q      | Q      | H4t1, H4t2                                                                                          |
| 2772931  | T   | C   | AGGCG{C}ACTGC  | yjfV | None   | None   | M1t1                                                                                                |
| 2781839  | T   | C   | CACCG{C}CGTAC  | ypjA | T      | A      | H3t2                                                                                                |
| 2782227  | C   | T   | GCATG{T}CCTTG  | ypjA | G      | G      | H1t1                                                                                                |
| 2788843  | T   | A   | GTTAC{A}AATTT  | None | N/A    | N/A    | H3t2                                                                                                |

Table 1: SNP Mutations (continued)

| position | ref | new | local sequence | gene | ref AA | new AA | samples         |
|----------|-----|-----|----------------|------|--------|--------|-----------------|
| 2793107  | C   | T   | GCCGC{T}ACCAA  | gabT | A      | A      | HM3t2           |
| 2793110  | C   | G   | GCCAC{G}AAACG  | gabT | T      | T      | HM3t2           |
| 2793111  | A   | T   | CCACC{T}AACGT  | gabT | K      | *      | HM3t2           |
| 2793112  | A   | T   | CACCA{T}ACGTA  | gabT | K      | I      | HM3t2           |
| 2793113  | A   | T   | ACCAA{T}CGTAG  | gabT | K      | N      | HM3t2           |
| 2793114  | C   | G   | CCAAA{G}GTAGC  | gabT | R      | G      | HM3t2           |
| 2793117  | A   | G   | AACGT{G}GCGGC  | gabT | S      | G      | HM3t2           |
| 2802285  | G   | A   | ATGAC{A}TAGAG  | nrdE | V      | I      | M1t1            |
| 2806031  | G   | A   | CCGTG{A}GATAC  | proW | W      | *      | HM1t2           |
| 2811712  | T   | C   | ACAGA{C}GCTCG  | emrA | D      | D      | M3t1, M3t2      |
| 2812423  | T   | C   | CAATA{C}CCGCT  | emrA | Y      | Y      | H3t1            |
| 2820221  | C   | T   | GAAGT{T}GAAGC  | alaS | D      | N      | L4t2            |
| 2823789  | T   | C   | CCGGG{C}AATAC  | None | N/A    | N/A    | HM2t2           |
| 2824418  | A   | G   | GTTGC{G}ATTTT  | None | N/A    | N/A    | HM4t2           |
| 2826639  | C   | T   | AACGA{T}GTATT  | srlE | R      | C      | L2t1            |
| 2827461  | G   | A   | CCTGC{A}GACCT  | srlB | A      | A      | HM2t1,<br>HM2t2 |
| 2833452  | G   | A   | GGCTG{A}TGGAG  | norV | V      | M      | L2t1            |
| 2841453  | T   | G   | TGGAG{G}TTTTC  | ascB | F      | V      | LM3t2           |
| 2842429  | C   | T   | GGATG{T}GGCGT  | None | N/A    | N/A    | M2t2            |
| 2855753  | A   | G   | GGCGG{G}TAAAA  | fhlA | D      | G      | H3t1            |
| 2857147  | G   | A   | CTCAG{A}CTGAA  | mutS | R      | R      | H1t1            |
| 2865624  | G   | A   | ACATC{A}GCTGG  | ygbN | G      | S      | H1t1            |
| 2873775  | G   | A   | TCGCT{A}CATAA  | cysC | C      | C      | H3t1            |
| 2874969  | C   | T   | TGTGA{T}GACGG  | cysN | R      | H      | H1t2            |
| 2881810  | C   | T   | AGTAA{T}CGCAT  | casC | V      | I      | M1t2            |
| 2884827  | C   | T   | TAAGG{T}AATAA  | cas3 | L      | L      | L3t1            |
| 2886728  | A   | G   | ATGTA{G}TATAA  | cas3 | L      | L      | HM4t1           |
| 2887097  | A   | T   | CCACC{T}GCAAT  | cas3 | W      | R      | H1t1            |
| 2888449  | T   | C   | TAAAG{C}CGCCG  | cysI | D      | G      | H2t2            |
| 2893730  | A   | G   | TTATC{G}GCATG  | ygcN | Q      | R      | LM2t1           |
| 2895608  | G   | A   | CGTCC{A}CAGGC  | ygcQ | A      | V      | HM1t1,<br>HM1t2 |
| 2895879  | T   | C   | GCTCT{C}GCCAG  | ygcR | A      | A      | L2t2            |
| 2897439  | A   | G   | CAGCA{G}AATAC  | ygcS | L      | L      | H4t2            |
| 2908327  | G   | T   | AACTG{T}CACTG  | pyrG | C      | *      | M4t2            |
| 2915910  | G   | A   | AGCGC{A}CCCAG  | barA | A      | T      | M2t2            |
| 2916111  | A   | G   | TCTCG{G}AACTG  | barA | K      | E      | H4t2            |
| 2920612  | T   | C   | GGCGT{C}ATCGG  | gudX | N      | D      | HM1t1           |
| 2924838  | A   | G   | AGATT{G}CACAC  | syd  | C      | C      | HM1t1           |
| 2925743  | G   | A   | ATATC{A}TCTTG  | queF | R      | H      | LM3t2           |
| 2927937  | C   | G   | CGCCC{G}GGAAG  | None | N/A    | N/A    | HM1t1           |
| 2941850  | G   | A   | TATTT{A}CCAGC  | gcvA | A      | V      | M4t1, M4t2      |
| 2947390  | G   | A   | CGCGG{A}GTGGA  | metZ | None   | None   | L1t1            |
| 2949731  | A   | G   | CGTCA{G}CTGGA  | argA | Q      | Q      | H1t2            |
| 2956180  | C   | T   | TGCGG{T}GTCAG  | ptrA | T      | T      | HM2t2           |

Table 1: SNP Mutations (continued)

| position | ref | new | local sequence | gene | ref AA | new AA | samples                   |
|----------|-----|-----|----------------|------|--------|--------|---------------------------|
| 2959622  | G   | A   | GGCTG{A}CGACA  | recC | R      | R      | HM3t1,<br>HM3t2           |
| 2962843  | T   | A   | CCTGT{A}CGCCA  | ygdB | R      | R      | M3t2                      |
| 2966385  | C   | T   | CAAGC{T}CAATG  | ptsP | G      | E      | HM3t2                     |
| 2967681  | T   | C   | GGGTG{C}CCGAA  | ptsP | D      | G      | H1t2                      |
| 2967940  | G   | A   | ATATT{A}CCCAA  | ptsP | Q      | *      | H3t2                      |
| 2968045  | G   | A   | CTCTC{A}TTGCT  | ptsP | R      | *      | H3t2                      |
| 2972650  | A   | T   | CGGTT{T}AAACC  | None | N/A    | N/A    | HM1t2                     |
| 2972651  | A   | T   | GGTTA{T}AACCG  | None | N/A    | N/A    | HM1t2                     |
| 2975327  | A   | G   | GGGTA{G}AGTTG  | aas  | F      | S      | LM4t2                     |
| 2976755  | G   | A   | CGTGC{A}CTGGC  | galR | A      | A      | H4t2                      |
| 2982654  | T   | C   | TCATC{C}GCCCC  | kduD | A      | A      | Anc2                      |
| 2983850  | G   | A   | CCATC{A}ACAGT  | kduI | V      | V      | H1t2                      |
| 2991572  | T   | C   | ACAAT{C}ACTTC  | ygeG | Y      | H      | HM1t2                     |
| 2991613  | T   | C   | ATGGG{C}CAATG  | ygeG | G      | G      | HM4t1,<br>HM4t2           |
| 3001040  | T   | A   | ATTTG{A}CGGTG  | xdhA | None   | None   | LM3t2                     |
| 3002851  | T   | C   | CCAGC{C}AATAG  | xdhB | L      | P      | L1t1                      |
| 3006312  | C   | T   | CCTCT{T}ACCTT  | ygeW | H      | Y      | HM2t1                     |
| 3016030  | T   | C   | CTCAA{C}GATAT  | None | N/A    | N/A    | Anc3                      |
| 3018616  | T   | C   | AAATA{C}CCGTT  | ygfK | I      | T      | H1t1, H1t2,<br>L1t1, L1t2 |
| 3019334  | G   | A   | GGATT{A}TCTGC  | ssnA | V      | I      | L2t1, L2t2                |
| 3024938  | G   | A   | TAATT{A}TGGTG  | xanQ | V      | M      | L4t1                      |
| 3026780  | C   | T   | GCAAA{T}GCTGA  | guaD | T      | M      | HM3t2                     |
| 3030159  | A   | G   | GCCGC{G}AATTT  | ygfT | C      | R      | Anc1                      |
| 3035545  | T   | C   | GGACG{C}GCGAT  | prfB | T      | A      | H2t2                      |
| 3041239  | A   | G   | AGTGA{G}AGCAC  | None | N/A    | N/A    | Anc2                      |
| 3042929  | G   | A   | GGAAT{A}GCGTG  | yqfA | A      | A      | M2t1, M2t2                |
| 3048417  | G   | A   | TGATG{A}TCGAG  | gcvP | D      | D      | LM4t2                     |
| 3051666  | A   | G   | TCGCT{G}AGCGG  | ubiI | L      | L      | L1t2                      |
| 3052640  | G   | A   | CAATC{A}GGTGC  | ubiH | P      | L      | HM1t1,<br>HM1t2           |
| 3057559  | A   | G   | TGTCG{G}ATTCA  | serA | F      | S      | L4t1                      |
| 3060385  | C   | T   | ATCTG{T}CTCCA  | argP | P      | S      | HM4t1                     |
| 3069545  | G   | A   | CACGC{A}TCCCA  | mscS | R      | C      | L4t1, L4t2                |
| 3071532  | C   | T   | TGCGC{T}GCCGC  | pgk  | G      | S      | L3t2                      |
| 3077175  | T   | C   | CCGGT{C}GCAAT  | yggP | Q      | R      | HM2t2                     |

Table 1: SNP Mutations (continued)

| position | ref | new | local sequence | gene | ref AA | new AA | samples                                                                                                       |
|----------|-----|-----|----------------|------|--------|--------|---------------------------------------------------------------------------------------------------------------|
| 3089230  | T   | C   | GGACG{C}AAACC  | galP | R      | R      | AncAgg,<br>Anc2, Anc3,<br>H3t1, H3t2,<br>HM4t1,<br>HM4t2,<br>L1t1,<br>L1t2, L2t1,<br>LM4t1,<br>LM4t2,<br>M2t1 |
| 3103111  | A   | G   | AAAGT{G}TGGCT  | mutY | V      | V      | M1t1                                                                                                          |
| 3116347  | A   | G   | TACAG{G}CGCTG  | yghJ | R      | R      | H3t2                                                                                                          |
| 3123645  | A   | G   | CTGCC{G}GCAAC  | glcB | L      | P      | LM3t2                                                                                                         |
| 3129664  | T   | C   | GCCAG{C}AAATC  | yghO | L      | L      | H3t2                                                                                                          |
| 3129794  | A   | G   | TATTC{G}GGCTG  | yghO | L      | P      | M1t1                                                                                                          |
| 3132450  | A   | G   | CCGCC{G}GCCTT  | None | N/A    | N/A    | HM1t1                                                                                                         |
| 3140642  | G   | A   | ACCCC{A}TCCAC  | hybE | T      | M      | H3t1                                                                                                          |
| 3146504  | A   | G   | GAATT{G}TTCTC  | yghW | N      | N      | L1t1                                                                                                          |
| 3154138  | G   | T   | TTCCT{T}ATGAT  | yghB | L      | L      | H2t2                                                                                                          |
| 3155770  | T   | C   | GACGC{C}GCCAG  | yqhD | L      | P      | L4t1                                                                                                          |
| 3163169  | C   | T   | CTGCC{T}GAAGA  | plsC | G      | R      | LM3t1                                                                                                         |
| 3165088  | G   | A   | CAGGC{A}GGTCG  | parC | R      | C      | H4t2                                                                                                          |
| 3165645  | T   | C   | GATCG{C}CCGGC  | parC | D      | G      | M4t2                                                                                                          |
| 3184986  | T   | C   | AGCCG{C}GAAGA  | ubiK | R      | R      | H4t1                                                                                                          |
| 3220581  | G   | A   | AAAAG{A}CGATA  | patA | G      | D      | LM4t2                                                                                                         |
| 3223414  | G   | T   | CAGCA{T}CGCCA  | ebgA | S      | I      | H3t1                                                                                                          |
| 3227978  | A   | G   | GATAT{G}TGGAT  | ygjJ | M      | V      | H1t1                                                                                                          |
| 3230005  | G   | A   | CTCCT{A}GCAGA  | ygjK | W      | *      | HM1t1                                                                                                         |
| 3231301  | G   | T   | CTCCT{T}GCCGG  | None | N/A    | N/A    | LM2t2                                                                                                         |
| 3236514  | C   | T   | GACCT{T}CCCCC  | None | N/A    | N/A    | H3t2                                                                                                          |
| 3237048  | A   | G   | CATCG{G}CGCTA  | ygjQ | D      | G      | HM4t1                                                                                                         |
| 3248825  | T   | G   | TAACT{G}CCTGT  | None | N/A    | N/A    | LM1t2                                                                                                         |
| 3248827  | C   | A   | ACTTC{A}TGTTA  | None | N/A    | N/A    | LM1t2                                                                                                         |
| 3248828  | T   | A   | CTTCC{A}GTTAT  | None | N/A    | N/A    | LM3t2                                                                                                         |
| 3254004  | A   | G   | CTCCA{G}CAACA  | yhaJ | L      | L      | LM4t2                                                                                                         |
| 3264160  | G   | A   | GCTTT{A}GCTTC  | tdcC | A      | A      | H4t2                                                                                                          |
| 3271146  | C   | T   | TGGGC{T}AAAGA  | garK | G      | S      | M1t1                                                                                                          |
| 3273796  | A   | G   | CAGAA{G}TCACC  | garP | I      | T      | M2t1                                                                                                          |
| 3274473  | T   | C   | CCACG{C}TCTTT  | garP | E      | E      | H3t1, H3t2                                                                                                    |
| 3275801  | A   | T   | GGCTG{T}ATCAT  | garD | N      | Y      | H2t1                                                                                                          |
| 3277048  | A   | G   | ATCAA{G}GGTCA  | prlF | K      | R      | HM4t1                                                                                                         |
| 3285202  | C   | T   | GAAAG{T}GATGC  | agaC | A      | V      | HM3t2                                                                                                         |
| 3286432  | A   | T   | TGGCG{T}CCGGA  | agaI | T      | S      | H3t1                                                                                                          |
| 3293719  | A   | G   | GGTAG{G}GATTA  | lpoA | E      | G      | LM2t2                                                                                                         |
| 3301001  | G   | A   | GCGTC{A}GCACT  | yhbT | A      | A      | Anc3                                                                                                          |
| 3301811  | T   | C   | CCGCA{C}ATTGA  | yhbU | H      | H      | H2t1                                                                                                          |
| 3304825  | G   | A   | GGCGG{A}GCAAA  | mtr  | A      | A      | H2t2                                                                                                          |

Table 1: SNP Mutations (continued)

| position | ref | new | local sequence | gene | ref AA | new AA | samples                                                                                                                                                                                                                                 |
|----------|-----|-----|----------------|------|--------|--------|-----------------------------------------------------------------------------------------------------------------------------------------------------------------------------------------------------------------------------------------|
| 3314075  | T   | C   | TCTTC{C}CGTCA  | infB | E      | G      | H1t1                                                                                                                                                                                                                                    |
| 3321231  | G   | A   | TTACT{A}CCAAA  | yhbX | A      | V      | HM3t1                                                                                                                                                                                                                                   |
| 3327032  | C   | T   | TCTCC{T}GGTTA  | None | N/A    | N/A    | Anc2                                                                                                                                                                                                                                    |
| 3333124  | A   | G   | TTTGA{G}ATCTC  | None | N/A    | N/A    | M2t1, M2t2                                                                                                                                                                                                                              |
| 3333447  | T   | C   | CCGCG{C}ACATA  | rplU | Y      | C      | M1t2                                                                                                                                                                                                                                    |
| 3335721  | A   | G   | TCGAG{G}GTATC  | murA | T      | T      | LM4t1                                                                                                                                                                                                                                   |
| 3339353  | G   | A   | CGCGC{A}GATCA  | m1aF | P      | L      | Anc1                                                                                                                                                                                                                                    |
| 3351944  | A   | G   | CAAGG{G}AGCTG  | arcB | F      | S      | HM2t1                                                                                                                                                                                                                                   |
| 3355508  | C   | T   | CACCG{T}TTATC  | gltB | L      | F      | H1t2                                                                                                                                                                                                                                    |
| 3361437  | A   | T   | CCTGC{T}CAGCA  | gltF | T      | S      | L3t2                                                                                                                                                                                                                                    |
| 3365016  | G   | C   | TGAAG{C}CAACT  | yhcD | G      | A      | LM3t2                                                                                                                                                                                                                                   |
| 3365553  | T   | C   | TCAAT{C}AGGGA  | yhcE | None   | None   | H3t1                                                                                                                                                                                                                                    |
| 3368987  | T   | C   | GTGTC{C}GCAGA  | None | N/A    | N/A    | H2t1, H2t2                                                                                                                                                                                                                              |
| 3376761  | T   | C   | TTAGC{C}GTGAC  | sspB | Q      | R      | L2t2                                                                                                                                                                                                                                    |
| 3391186  | A   | G   | ACTAA{G}TACTG  | tldD | F      | L      | L3t2                                                                                                                                                                                                                                    |
| 3392348  | G   | A   | CGGCT{A}CCGGA  | None | N/A    | N/A    | M4t2                                                                                                                                                                                                                                    |
| 3393280  | G   | A   | GTCCG{A}CCAGC  | yhdP | P      | S      | Anc3                                                                                                                                                                                                                                    |
| 3393378  | T   | C   | GATAT{C}TGATA  | yhdP | K      | R      | M4t2                                                                                                                                                                                                                                    |
| 3395404  | T   | C   | CGCGG{C}CAGAT  | yhdP | T      | A      | L4t2                                                                                                                                                                                                                                    |
| 3411224  | A   | G   | GGCAT{G}CTTCG  | dusB | Y      | C      | H2t2                                                                                                                                                                                                                                    |
| 3417524  | C   | T   | CCGCG{T}CAGGA  | acrF | P      | S      | Anc1                                                                                                                                                                                                                                    |
| 3418778  | A   | G   | CCACC{G}GAAAT  | None | N/A    | N/A    | LM4t2                                                                                                                                                                                                                                   |
| 3423345  | T   | A   | CCTAC{A}CGGGA  | None | N/A    | N/A    | H4t1                                                                                                                                                                                                                                    |
| 3437557  | A   | G   | TTGCG{G}TTTCA  | trkA | I      | V      | AncAgg,<br>Anc1, Anc2,<br>Anc3, H1t1,<br>H1t2, H4t2,<br>HM2t1,<br>HM2t2,<br>HM3t2,<br>HM4t1,<br>HM4t2,<br>L1t1, L2t1,<br>L2t2, L3t1,<br>L4t1, L4t2,<br>LM1t1,<br>LM1t2,<br>LM2t1,<br>LM3t1,<br>LM3t2,<br>LM4t1,<br>LM4t2,<br>M1t1, M2t1 |
| 3439964  | G   | A   | GTTGC{A}GTTCA  | rplQ | R      | C      | H2t2                                                                                                                                                                                                                                    |
| 3442013  | G   | A   | GTGTT{A}TTGAA  | rpsK | N      | N      | HM1t2                                                                                                                                                                                                                                   |
| 3444453  | T   | C   | GGTTT{C}ACCGA  | rplO | K      | E      | H4t1                                                                                                                                                                                                                                    |
| 3447463  | T   | C   | ATAGT{C}TCGCT  | rplX | E      | E      | HM4t2                                                                                                                                                                                                                                   |

Table 1: SNP Mutations (continued)

| position | ref | new | local sequence | gene     | ref AA | new AA | samples         |
|----------|-----|-----|----------------|----------|--------|--------|-----------------|
| 3451013  | T   | C   | CAGAC{C}GAATC  | rplB     | Q      | R      | HM2t1           |
| 3453910  | T   | C   | GGCGA{C}ATAGA  | gspB     | I      | V      | M3t1            |
| 3461140  | G   | A   | AAGGC{A}GATAA  | gspG     | A      | A      | H1t2            |
| 3474803  | A   | G   | CATAG{G}CCTTA  | tusB     | V      | A      | H1t2            |
| 3488602  | G   | A   | ACACC{A}GGCAT  | yhfK     | R      | Q      | M3t2            |
| 3489066  | G   | T   | GGTCC{T}GCATT  | argD     | A      | A      | H4t2            |
| 3491454  | T   | C   | ATTTA{C}CGCTC  | fic—yhfG | D—R    | G—R    | M1t1            |
| 3491662  | G   | A   | AAGCG{A}CAAAT  | None     | N/A    | N/A    | HM1t2           |
| 3497291  | C   | T   | ATCAG{T}CACGG  | nirC     | S      | S      | H2t1            |
| 3502675  | A   | G   | GGCCC{G}CGCGG  | frlC     | H      | R      | HM2t1           |
| 3509589  | C   | T   | CTCTG{T}CACGC  | yhfW     | A      | T      | LM4t1,<br>LM4t2 |
| 3520980  | A   | G   | GGCAC{G}ATGCA  | hofP     | L      | S      | H4t2            |
| 3527737  | A   | G   | GTTTG{G}CTGCT  | igaA     | D      | G      | HM3t2           |
| 3529625  | A   | G   | TAGAG{G}AACGC  | hslR     | K      | E      | HM3t2           |
| 3532637  | T   | C   | GAACA{C}TTTCC  | None     | N/A    | N/A    | H4t2            |
| 3540055  | T   | C   | TGTGT{C}GTTGA  | None     | N/A    | N/A    | M3t2            |
| 3547949  | A   | G   | ATAAG{G}CGCGT  | None     | N/A    | N/A    | M2t1            |
| 3552489  | T   | C   | TTTCT{C}AGATT  | None     | N/A    | N/A    | LM1t1           |
| 3558898  | T   | C   | CCGAT{C}CTGCT  | rteR     | I      | I      | M2t1            |
| 3560919  | T   | C   | AAGCG{C}AATGA  | glpG     | T      | A      | H3t2            |
| 3562840  | G   | A   | CAAAG{A}CGATC  | glpD     | G      | D      | M3t1, M3t2      |
| 3565443  | C   | T   | TGACG{T}GGCAG  | glgP     | P      | P      | H3t1            |
| 3569502  | G   | A   | AAAGC{A}ATCCG  | glgX     | R      | C      | HM1t2           |
| 3569852  | A   | G   | GTTCA{G}CCAGG  | glgX     | V      | A      | M2t1            |
| 3570116  | C   | T   | AACGA{T}GGGCA  | glgX     | R      | H      | L4t1            |
| 3579479  | G   | T   | TGAGT{T}CCGAA  | yhhW     | G      | G      | H3t2            |
| 3596425  | C   | T   | CCGCC{T}GCATT  | None     | N/A    | N/A    | H2t1            |
| 3597287  | T   | A   | TGCCG{A}CATTA  | livK     | D      | V      | M1t2            |
| 3606708  | A   | G   | CGAAA{G}ACTGG  | zntA     | K      | R      | M1t1            |
| 3611575  | A   | G   | CCAGA{G}GGCGC  | yhhS     | F      | L      | HM1t2           |
| 3628887  | C   | T   | CCAGC{T}AGTCG  | rbbA     | W      | *      | M2t2            |

Table 1: SNP Mutations (continued)

| position | ref | new | local sequence | gene | ref AA | new AA | samples                                                                                                                                                                                        |
|----------|-----|-----|----------------|------|--------|--------|------------------------------------------------------------------------------------------------------------------------------------------------------------------------------------------------|
| 3629956  | T   | C   | GGGGC{C}TTCAG  | yhiI | K      | K      | AncAgg,<br>Anc1, Anc2,<br>Anc3, H1t2,<br>H4t1, H4t2,<br>HM1t1,<br>HM1t2,<br>HM2t1,<br>HM2t2,<br>L1t1,<br>L1t2, L2t1,<br>L2t2, L3t1,<br>L4t1, L4t2,<br>LM1t1,<br>LM4t1,<br>LM4t2,<br>M2t1, M2t2 |
| 3633312  | T   | C   | GCCTT{C}CTGAG  | yhiL | None   | None   | M3t1                                                                                                                                                                                           |
| 3635557  | A   | G   | ACTGC{G}GGGGA  | yhiM | Q      | R      | L3t1                                                                                                                                                                                           |
| 3643020  | T   | C   | GGCGT{C}AACAC  | rsmJ | L      | L      | HM1t1,<br>HM1t2                                                                                                                                                                                |
| 3649133  | C   | T   | ATCAG{T}CTGCT  | arsB | S      | S      | H4t1, H4t2                                                                                                                                                                                     |
| 3654447  | A   | G   | GGTGC{G}TTCTG  | slp  | A      | A      | HM2t1                                                                                                                                                                                          |
| 3686628  | C   | T   | GTGCC{T}CAGTT  | bcsC | W      | *      | H3t2                                                                                                                                                                                           |
| 3688257  | A   | G   | CCCAG{G}GCTTC  | bcsC | A      | A      | AncAgg                                                                                                                                                                                         |
| 3694071  | C   | T   | TGCGG{T}GTCTG  | bcsA | T      | T      | H1t2                                                                                                                                                                                           |
| 3700072  | T   | C   | CCAGC{C}CTGCG  | ldrD | E      | G      | M3t1                                                                                                                                                                                           |
| 3702393  | A   | T   | TGCGG{T}TAGCG  | dppF | Y      | *      | L1t1                                                                                                                                                                                           |
| 3718957  | T   | C   | CTTCT{C}TATCA  | yiaF | K      | R      | L3t1                                                                                                                                                                                           |
| 3732102  | A   | G   | ATTCC{G}CAAAG  | xylF | H      | R      | H4t1                                                                                                                                                                                           |
| 3738063  | C   | T   | CGCCA{T}GGTTT  | malS | T      | M      | H1t2                                                                                                                                                                                           |
| 3751791  | T   | C   | ACCAA{C}GGATA  | yiaT | I      | V      | L1t1                                                                                                                                                                                           |
| 3751913  | A   | G   | ATAAT{G}ATGCT  | None | N/A    | N/A    | LM1t2                                                                                                                                                                                          |
| 3776814  | G   | A   | TGCTC{A}CCTGC  | yibL | R      | H      | LM1t2                                                                                                                                                                                          |
| 3782309  | A   | T   | TGAAT{T}TCACA  | cysE | D      | E      | LM2t2                                                                                                                                                                                          |
| 3796147  | G   | A   | CCTGT{A}GCAAT  | waaC | V      | V      | H3t1, H3t2                                                                                                                                                                                     |
| 3802148  | C   | T   | TTGTT{T}GGTTT  | waaO | P      | P      | LM2t1,<br>LM2t2                                                                                                                                                                                |
| 3825314  | T   | A   | GGATC{A}ACTCT  | recG | L      | Q      | Anc1                                                                                                                                                                                           |
| 3845423  | A   | G   | AAGAG{G}TGGCG  | adeD | M      | V      | L1t1                                                                                                                                                                                           |
| 3850408  | T   | A   | GTTCA{A}CCGGG  | uhpA | D      | V      | L3t1                                                                                                                                                                                           |
| 3860752  | G   | A   | ATCTG{A}CAGTC  | yidL | A      | T      | H1t2                                                                                                                                                                                           |
| 3862478  | C   | T   | GGATC{T}AGTTT  | None | N/A    | N/A    | HM2t1                                                                                                                                                                                          |
| 3863662  | T   | C   | AGGCC{C}GGAGC  | None | N/A    | N/A    | HM3t2                                                                                                                                                                                          |
| 3875560  | A   | G   | GTATC{G}ATCGC  | yidX | Q      | R      | L3t2                                                                                                                                                                                           |
| 3876235  | C   | T   | TAGCG{T}TATCC  | yidA | S      | N      | H3t1                                                                                                                                                                                           |
| 3880759  | A   | C   | GCTTG{C}GATTG  | recF | L      | R      | H2t1                                                                                                                                                                                           |



Table 1: SNP Mutations (continued)

| position | ref | new | local sequence | gene | ref AA | new AA | samples         |
|----------|-----|-----|----------------|------|--------|--------|-----------------|
| 3881927  | C   | T   | GCCTG{T}GGCAG  | dnaN | P      | P      | HM4t1,<br>HM4t2 |
| 3882538  | T   | C   | GACGC{C}TGGA   | dnaA | K      | R      | H2t1            |
| 3884049  | A   | T   | GCTTA{T}TCGAT  | ysdD | N      | I      | L3t2            |
| 3885287  | A   | T   | TGACC{T}TCAAC  | yidC | I      | F      | M2t2            |
| 3888161  | A   | G   | GGCGG{G}TTTTTC | mmnE | I      | V      | H2t1            |
| 3890511  | T   | A   | TACCG{A}TGCCT  | tnaB | V      | D      | HM4t2           |
| 3894364  | T   | A   | GACGA{A}CCGCG  | yieE | D      | E      | LM4t2           |
| 3895233  | C   | G   | GCCAG{G}AATCA  | None | N/A    | N/A    | LM4t1           |
| 3895234  | A   | C   | CCAGC{C}ATCAT  | None | N/A    | N/A    | LM4t1           |
| 3895237  | C   | G   | GCAAT{G}ATGCA  | None | N/A    | N/A    | LM4t1           |
| 3895240  | G   | T   | ATCAT{T}CATGG  | None | N/A    | N/A    | LM4t1           |
| 3895241  | C   | G   | TCATG{G}ATGGC  | None | N/A    | N/A    | LM4t1           |
| 3895242  | A   | C   | CATGC{C}TGGCG  | None | N/A    | N/A    | LM4t1           |
| 3901227  | T   | C   | CGTTA{C}TATCC  | bglH | N      | S      | Anc2            |
| 3902797  | C   | T   | CCAGT{T}ATGTA  | bglB | M      | I      | H3t2            |
| 3916543  | G   | A   | AGAAC{A}CCCAT  | atpD | G      | G      | HM1t1,<br>HM1t2 |
| 3917315  | T   | C   | CATCC{C}GAGGG  | atpD | Q      | R      | L2t1            |
| 3927457  | A   | C   | CCCCG{C}TGAAG  | asnA | D      | A      | LM2t1           |
| 3930349  | A   | G   | CCGAG{G}CATAA  | ravA | V      | A      | L2t1            |
| 3932990  | A   | G   | GAAGG{G}TTAAG  | kup  | G      | G      | M2t1, M2t2      |
| 3937595  | G   | A   | TTTTT{A}TTAAT  | rbsK | V      | I      | M4t2            |
| 3949333  | T   | C   | AAAGG{C}TGTGC  | yifB | N      | S      | HM2t2           |
| 3954799  | G   | A   | GCGTC{A}ATGAC  | ilvD | D      | N      | M4t2            |
| 3956240  | C   | T   | CACAA{T}ATTCT  | ilvA | N      | N      | H4t1            |
| 3960352  | C   | T   | GAATG{T}GGCCA  | yifN | None   | None   | LM4t2           |
| 3965442  | A   | G   | AAGAA{G}CGCCA  | rhlB | F      | L      | H1t1            |
| 3968088  | A   | G   | CAGGG{G}TTTGC  | rfe  | I      | V      | H3t1            |
| 3979884  | T   | C   | CTGGC{C}TTTTG  | wzyE | L      | P      | H4t1            |
| 3980812  | A   | G   | AAAAC{G}TTTGC  | None | N/A    | N/A    | H4t1            |
| 3987012  | A   | T   | GTTTC{T}GGCCA  | hemY | L      | Q      | L1t1            |
| 3993593  | G   | A   | AGGTT{A}ATGGT  | cyaA | D      | N      | M2t1, M2t2      |
| 4002938  | A   | G   | TAGAG{G}TGATA  | yigG | I      | T      | M3t1            |
| 4006079  | C   | T   | TTCAC{T}GCTGA  | recQ | P      | L      | Anc2            |
| 4034678  | C   | T   | CGGAA{T}TGAAA  | hemG | L      | L      | HM2t1           |
| 4053800  | G   | A   | TTATC{A}GAACA  | None | N/A    | N/A    | H1t2            |
| 4054839  | G   | A   | TGCAT{A}GCTGG  | glnG | A      | A      | H1t1            |
| 4063708  | T   | C   | TTCAT{C}AATAC  | ompL | N      | D      | Anc2            |
| 4073188  | C   | T   | AATGG{T}ATTTG  | yihU | A      | T      | LM2t2           |

Table 1: SNP Mutations (continued)

| position | ref | new | local sequence | gene | ref AA | new AA | samples                                                                                                                  |
|----------|-----|-----|----------------|------|--------|--------|--------------------------------------------------------------------------------------------------------------------------|
| 4091182  | C   | T   | CAGAG{T}GTAAG  | frvB | A      | T      | AncAgg,<br>Anc1, Anc2,<br>H3t1, H3t2,<br>HM4t1,<br>L1t2, L2t1,<br>LM1t1,<br>LM2t1,<br>M1t1, M1t2,<br>M2t1, M2t2,<br>M4t1 |
| 4102703  | A   | G   | GATGA{G}CTAAC  | None | N/A    | N/A    | HM3t2                                                                                                                    |
| 4108430  | A   | G   | GGTTC{G}CCACG  | pfkA | H      | R      | H1t1                                                                                                                     |
| 4112983  | A   | G   | TAGAT{G}AATGC  | yiiS | K      | E      | HM3t1                                                                                                                    |
| 4118905  | C   | T   | ATGGT{T}GCCGG  | rraA | D      | N      | H1t1                                                                                                                     |
| 4120653  | T   | C   | GATAT{C}TACGC  | hslU | N      | D      | LM4t1                                                                                                                    |
| 4136148  | C   | G   | GTGGC{G}TGGTT  | yijE | L      | V      | LM3t2                                                                                                                    |
| 4138404  | C   | T   | TCCAG{T}AGGGT  | gldA | L      | L      | H3t1                                                                                                                     |
| 4140587  | G   | A   | CGACG{A}CACTT  | ptsA | P      | S      | Anc3                                                                                                                     |
| 4142411  | A   | T   | TACTG{T}TATTA  | None | N/A    | N/A    | H3t2                                                                                                                     |
| 4145558  | A   | G   | GGCGT{G}CAGGG  | pflD | V      | V      | H2t1                                                                                                                     |
| 4149791  | G   | C   | GCAGG{C}CAAAA  | eptC | A      | G      | L1t1                                                                                                                     |
| 4150245  | G   | A   | AGCCT{A}GACTT  | eptC | Q      | *      | M1t1                                                                                                                     |
| 4154151  | A   | T   | CGGTA{T}ACGCT  | argE | F      | Y      | L4t2                                                                                                                     |
| 4158936  | A   | G   | GGTGA{G}AGAGA  | oxyR | K      | R      | HM2t1                                                                                                                    |
| 4174196  | A   | G   | CCACA{G}TGTCA  | coaA | L      | L      | HM1t1                                                                                                                    |
| 4178163  | C   | T   | CCGTT{T}GCTGA  | nusG | F      | F      | L2t1                                                                                                                     |
| 4182689  | G   | A   | TGGGC{A}ATCTG  | rpoB | D      | N      | HM2t2                                                                                                                    |
| 4182888  | A   | G   | TCGAG{G}CGTAC  | rpoB | D      | G      | LM3t1,<br>LM3t2                                                                                                          |
| 4182957  | T   | A   | TCTGA{A}CAACT  | rpoB | I      | N      | LM1t1,<br>LM1t2                                                                                                          |
| 4207890  | A   | G   | TTCAC{G}CAAAC  | None | N/A    | N/A    | H3t1                                                                                                                     |
| 4227407  | A   | G   | GCACA{G}ATTCA  | metH | Q      | Q      | L4t1                                                                                                                     |
| 4229392  | G   | A   | GACGC{A}TCAAG  | None | N/A    | N/A    | LM2t1                                                                                                                    |
| 4230035  | A   | G   | GATAA{G}CACCG  | pepE | F      | L      | H3t2                                                                                                                     |
| 4264035  | T   | C   | CCTGC{C}GCTTC  | qorA | A      | A      | Anc1                                                                                                                     |
| 4271363  | T   | C   | CGCGC{C}GGGCT  | uvrA | Q      | R      | H4t1                                                                                                                     |
| 4277167  | G   | A   | AAATC{A}GACGC  | soxS | P      | L      | LM4t2                                                                                                                    |
| 4284692  | A   | G   | CAGTG{G}TATTG  | actP | I      | T      | HM1t1                                                                                                                    |
| 4287795  | T   | A   | GTATC{A}TCAGC  | nrfA | F      | I      | Anc2                                                                                                                     |
| 4294444  | A   | G   | TCTGA{G}CGGGG  | None | N/A    | N/A    | LM4t2                                                                                                                    |
| 4294722  | G   | A   | TTGGC{A}CGAAA  | gltP | A      | T      | L3t2                                                                                                                     |

Table 1: SNP Mutations (continued)

| position | ref | new | local sequence | gene | ref AA | new AA | samples                                                                                                                                                                                                                                                                       |
|----------|-----|-----|----------------|------|--------|--------|-------------------------------------------------------------------------------------------------------------------------------------------------------------------------------------------------------------------------------------------------------------------------------|
| 4295832  | T   | C   | GTGAA{C}GCCTG  | None | N/A    | N/A    | AncAgg,<br>H1t2,<br>HM3t1,<br>L4t1, L4t2,<br>LM1t2,<br>M3t2                                                                                                                                                                                                                   |
| 4296058  | C   | T   | ATCAA{T}GCCTG  | None | N/A    | N/A    | AncAgg,<br>L4t1                                                                                                                                                                                                                                                               |
| 4296153  | T   | C   | GTTTA{C}GCCGC  | None | N/A    | N/A    | AncAgg,<br>H1t2,<br>H3t2, H4t1,<br>HM1t1,<br>HM1t2,<br>HM3t2,<br>HM4t2,<br>L1t2, L4t1,<br>LM1t1,<br>LM2t2,<br>LM3t2,<br>LM4t2,<br>M1t1, M2t1                                                                                                                                  |
| 4296188  | A   | G   | CGCTT{G}ACGCG  | None | N/A    | N/A    | AncAgg,<br>Anc2, Anc3,<br>H1t2, H2t2,<br>H3t1, H3t2,<br>H4t1, H4t2,<br>HM1t1,<br>HM1t2,<br>HM3t1,<br>HM3t2,<br>HM4t2,<br>L1t2,<br>L2t1, L2t2,<br>L3t1, L4t1,<br>LM1t1,<br>LM1t2,<br>LM2t2,<br>LM3t2,<br>LM4t1,<br>LM4t2,<br>M1t1, M1t2,<br>M2t1, M2t2,<br>M3t1, M3t2,<br>M4t2 |

Table 1: SNP Mutations (continued)

| position | ref | new | local sequence | gene | ref AA | new AA | samples                                                                                                                                                                                                                                                                      |
|----------|-----|-----|----------------|------|--------|--------|------------------------------------------------------------------------------------------------------------------------------------------------------------------------------------------------------------------------------------------------------------------------------|
| 4296189  | A   | C   | GCTTA{C}CGCGT  | None | N/A    | N/A    | AncAgg,<br>Anc2,<br>Anc3, H1t2,<br>H2t1, H2t2,<br>H3t1, H3t2,<br>H4t1, H4t2,<br>HM1t1,<br>HM1t2,<br>HM3t2,<br>HM4t2,<br>L1t2,<br>L2t1, L2t2,<br>L3t1, L4t1,<br>LM1t1,<br>LM1t2,<br>LM2t2,<br>LM3t2,<br>LM4t1,<br>LM4t2,<br>M1t1, M1t2,<br>M2t1, M2t2,<br>M3t1, M3t2,<br>M4t2 |
| 4296266  | T   | C   | GTTTA{C}GCCGC  | None | N/A    | N/A    | Anc2, Anc3,<br>H2t1, H2t2,<br>H4t1, H4t2,<br>HM1t1,<br>HM1t2,<br>HM2t1,<br>HM3t2,<br>HM4t2,<br>L2t2,<br>L3t1, L3t2,<br>LM1t1,<br>LM2t2,<br>LM3t1,<br>LM3t2,<br>LM4t1,<br>LM4t2,<br>M1t2, M2t1,<br>M2t2, M4t1                                                                 |
| 4296284  | C   | T   | ATCAA{T}GCCTG  | None | N/A    | N/A    | Anc2,<br>LM1t1,<br>LM2t2,<br>LM3t1                                                                                                                                                                                                                                           |
| 4296815  | C   | T   | CTTCA{T}CTTCT  | yjcO | G      | D      | H1t1                                                                                                                                                                                                                                                                         |
| 4302402  | A   | T   | GGCAA{T}AGACA  | mdtO | F      | Y      | HM1t1                                                                                                                                                                                                                                                                        |
| 4311465  | C   | T   | GCTGG{T}TGGCG  | alsB | S      | N      | M3t1                                                                                                                                                                                                                                                                         |
| 4317934  | C   | T   | GCTGA{T}GCGTC  | None | N/A    | N/A    | LM1t1                                                                                                                                                                                                                                                                        |

Table 1: SNP Mutations (continued)

| position | ref | new | local sequence | gene | ref AA | new AA | samples                                                                                                                                                                                                                                                                                                                   |
|----------|-----|-----|----------------|------|--------|--------|---------------------------------------------------------------------------------------------------------------------------------------------------------------------------------------------------------------------------------------------------------------------------------------------------------------------------|
| 4318136  | C   | T   | GCAGG{T}GGGCG  | phnK | R      | H      | HM1t1,<br>LM4t1                                                                                                                                                                                                                                                                                                           |
| 4321661  | C   | T   | ACGGA{T}ATCCA  | phnG | M      | I      | H2t1                                                                                                                                                                                                                                                                                                                      |
| 4321662  | A   | G   | CGGAC{G}TCCAG  | phnG | M      | T      | H2t1                                                                                                                                                                                                                                                                                                                      |
| 4326088  | T   | G   | ACGGA{G}GGTGC  | None | N/A    | N/A    | L4t1                                                                                                                                                                                                                                                                                                                      |
| 4326248  | G   | A   | GCACC{A}TTGCC  | None | N/A    | N/A    | HM4t1                                                                                                                                                                                                                                                                                                                     |
| 4332087  | T   | C   | CATAC{C}CTCCT  | None | N/A    | N/A    | L4t1                                                                                                                                                                                                                                                                                                                      |
| 4337840  | A   | G   | GCTTT{G}AGGCT  | adiY | L      | L      | M3t1                                                                                                                                                                                                                                                                                                                      |
| 4357163  | A   | T   | TCAAG{T}TACAT  | cadA | Y      | *      | M2t2                                                                                                                                                                                                                                                                                                                      |
| 4360573  | C   | T   | AGCAA{T}ACATA  | cadC | V      | V      | H2t2                                                                                                                                                                                                                                                                                                                      |
| 4365421  | A   | G   | GAAGG{G}TGTTA  | None | N/A    | N/A    | HM1t2                                                                                                                                                                                                                                                                                                                     |
| 4367427  | G   | T   | AGAGA{T}CAAGC  | aspA | L      | I      | H1t2                                                                                                                                                                                                                                                                                                                      |
| 4368113  | A   | G   | TCGCT{G}CACTT  | aspA | V      | A      | Anc1, H1t1,<br>H1t2,<br>HM4t1,<br>L1t1, L1t2                                                                                                                                                                                                                                                                              |
| 4375451  | G   | A   | GGATC{A}TCCGG  | epmB | D      | D      | H2t2                                                                                                                                                                                                                                                                                                                      |
| 4378015  | T   | C   | CGTGC{C}GCCAG  | ampC | A      | A      | HM4t2                                                                                                                                                                                                                                                                                                                     |
| 4390693  | A   | G   | GCCGA{G}CTCAC  | rsgA | F      | L      | H4t1, H4t2                                                                                                                                                                                                                                                                                                                |
| 4397411  | G   | C   | CGATT{C}ATGCC  | None | N/A    | N/A    | AncAgg,<br>Anc1,<br>Anc2, Anc3,<br>H1t2, H2t1,<br>H2t2, H3t1,<br>H3t2, H4t2,<br>HM1t2,<br>HM2t1,<br>HM3t2,<br>HM4t1,<br>HM4t2,<br>L1t1,<br>L1t2, L2t2,<br>L3t1, L3t2,<br>L4t1, L4t2,<br>LM1t1,<br>LM1t2,<br>LM2t1,<br>LM2t2,<br>LM3t1,<br>LM3t2,<br>LM4t1,<br>LM4t2,<br>M1t2, M2t1,<br>M2t2, M3t1,<br>M3t2, M4t1,<br>M4t2 |
| 4402653  | A   | G   | TTCTG{G}CGGAA  | hflK | T      | A      | HM1t1                                                                                                                                                                                                                                                                                                                     |
| 4417359  | C   | T   | GCCAG{T}ATGAT  | yjfP | S      | S      | HM4t1                                                                                                                                                                                                                                                                                                                     |

Table 1: SNP Mutations (continued)

| position | ref | new | local sequence | gene | ref AA | new AA | samples                                                                                                            |
|----------|-----|-----|----------------|------|--------|--------|--------------------------------------------------------------------------------------------------------------------|
| 4419604  | C   | T   | ACGGG{T}GATAC  | ulaG | A      | T      | H3t1                                                                                                               |
| 4428695  | T   | C   | TTGGT{C}TTAGT  | ytfB | K      | R      | H4t1                                                                                                               |
| 4432875  | C   | T   | CGCGA{T}GCGCC  | ytfF | R      | H      | HM2t1                                                                                                              |
| 4437631  | T   | C   | ATGAG{C}GTTTT  | None | N/A    | N/A    | H1t1, H3t1,<br>HM2t1,<br>HM2t2,<br>L2t1, L2t2,<br>L3t1, L4t1,<br>LM1t2,<br>LM2t2,<br>LM3t2,<br>M2t1, M4t1,<br>M4t2 |
| 4443568  | G   | A   | CACGC{A}TTCTC  | tamA | R      | H      | H1t2                                                                                                               |
| 4458552  | T   | C   | GAAAA{C}GGCGA  | pmbA | N      | N      | M3t2                                                                                                               |
| 4459916  | A   | G   | GATGC{G}CCACC  | nrdG | V      | A      | H3t2                                                                                                               |
| 4465606  | A   | G   | CAAGC{G}CGATA  | treB | V      | A      | L2t1, L2t2,<br>L4t1, L4t2,<br>LM4t2,<br>M2t1, M2t2                                                                 |
| 4468526  | C   | T   | GGCAC{T}GGTGG  | mgtA | P      | L      | M3t2                                                                                                               |
| 4468830  | C   | T   | CATAG{T}GCGTG  | mgtA | S      | S      | HM2t1                                                                                                              |
| 4486422  | T   | C   | GCCTG{C}TCCTC  | lptF | F      | L      | H1t2                                                                                                               |
| 4503403  | A   | G   | GGGAT{G}CCAGA  | insG | V      | A      | H2t2                                                                                                               |
| 4503458  | T   | C   | AGCGT{C}TCCGG  | None | N/A    | N/A    | L4t1                                                                                                               |
| 4503790  | T   | C   | AATTT{C}TGAAG  | None | N/A    | N/A    | H1t1                                                                                                               |
| 4505947  | T   | A   | TCCCG{A}CAGGA  | yjhC | S      | T      | LM2t2                                                                                                              |
| 4506686  | C   | T   | AGCAT{T}GCGAC  | yjhD | None   | None   | M1t1, M1t2                                                                                                         |
| 4513082  | C   | T   | CAGCG{T}GCTGG  | fecC | A      | T      | HM4t2                                                                                                              |
| 4523207  | T   | C   | TTCTC{C}ATCGC  | yjhG | I      | M      | M2t1                                                                                                               |
| 4530842  | C   | T   | CCGGC{T}AGCGT  | sgcX | L      | L      | H1t1                                                                                                               |
| 4538149  | G   | A   | ACCAG{A}GCGAT  | nanM | P      | L      | HM1t2                                                                                                              |
| 4544505  | T   | G   | CCTAT{G}TAATT  | fimC | L      | V      | L1t2                                                                                                               |
| 4546921  | A   | G   | TTCTG{G}CAGTA  | fimD | D      | G      | H3t1, H3t2                                                                                                         |
| 4549309  | A   | G   | TGTGG{G}ATATT  | fimH | N      | D      | LM2t1                                                                                                              |
| 4561573  | C   | T   | CGCCG{T}AGAGA  | yjiJ | C      | Y      | H4t2                                                                                                               |
| 4569272  | C   | T   | TATGG{T}CTTTC  | rpnD | None   | None   | H2t1                                                                                                               |
| 4573672  | T   | C   | TGGTT{C}TGATG  | yjiT | F      | S      | M1t1                                                                                                               |
| 4575706  | C   | T   | TTAAC{T}CCTTA  | yjiV | None   | None   | L1t1, L1t2                                                                                                         |
| 4590110  | A   | G   | TAAAG{G}CCCGG  | btsT | G      | G      | H1t1                                                                                                               |
| 4591863  | C   | T   | AACCG{T}GCGGG  | tsr  | R      | R      | LM1t1                                                                                                              |
| 4601917  | A   | G   | TGACC{G}CTCAA  | yjjB | W      | R      | HM1t2                                                                                                              |
| 4602030  | C   | T   | CAAAG{T}CGACC  | yjjB | G      | D      | M2t2                                                                                                               |
| 4604909  | T   | C   | GCACA{C}CCGGT  | fhuF | D      | G      | HM3t2                                                                                                              |
| 4609226  | G   | A   | CTGCT{A}GCTGA  | yjjG | W      | *      | HM4t1                                                                                                              |
| 4614496  | C   | T   | GCAGT{T}GGCGC  | None | N/A    | N/A    | M1t1                                                                                                               |
| 4614503  | T   | C   | GCGCA{C}AATGC  | None | N/A    | N/A    | M1t1                                                                                                               |

Table 1: SNP Mutations (continued)

| position | ref | new | local sequence | gene | ref AA | new AA | samples    |
|----------|-----|-----|----------------|------|--------|--------|------------|
| 4614580  | G   | A   | CGTTC{A}CGCCG  | None | N/A    | N/A    | M3t2       |
| 4615227  | A   | G   | TGCGG{G}CATGG  | yjjW | V      | A      | LM1t1      |
| 4616785  | T   | A   | CAAGA{A}CTTTC  | yjjI | D      | V      | M2t1, M2t2 |
| 4622925  | A   | G   | GGTGA{G}GTTTG  | yjjJ | K      | R      | H4t1       |
| 4629635  | T   | C   | TTCAG{C}TCTTC  | ettA | E      | E      | HM2t2      |
| 4636437  | C   | T   | CGCGG{T}GCAGA  | creB | A      | V      | HM2t1      |
| 4637817  | T   | C   | GGAAA{C}TTACT  | creC | N      | N      | L3t1       |
| 4638315  | C   | T   | ATTCG{T}CAAAG  | creD | R      | R      | H1t2       |

Table 2: Deletion Mutations

| position | size | local sequence | gene      | samples                   |
|----------|------|----------------|-----------|---------------------------|
| 123195   | 1    | CAACT{A}CATCA  | aceE      | H2t2                      |
| 367066   | 2    | TCTTT{GC}GCGC  | mhpR      | HM3t2                     |
| 459200   | 1    | AAACC{T}CTCTT  | lon       | H2t2                      |
| 488665   | 1    | GCGAC{A}ACGAT  | mscK      | M1t2                      |
| 528271   | 1    | AAACC{T}TTTTT  | ybbD      | H3t2,<br>HM3t1,<br>HM3t2  |
| 684682   | 1    | GAGCA{G}CAGCG  | gltK      | Anc2                      |
| 722745   | 1    | CGACG{T}TTTTT  | kdpD      | M3t1, M3t2,<br>M4t1, M4t2 |
| 771581   | 1    | TCCGT{G}GATAC  | cydA      | M1t2                      |
| 1088504  | 1    | TAGCC{T}GAATA  | pgaB      | H2t2                      |
| 1101745  | 1    | ACAAT{C}CAGCG  | csgE      | LM3t2                     |
| 1296580  | 3    | AGAGT{CAA}CAA  | adhE      | LM4t1                     |
| 1502009  | 2    | TAAAC{CA}CTGG  | ydcL      | H3t1                      |
| 1713542  | 1    | GCGGC{T}TTTTT  | dtpA/gstA | L3t1, L3t2                |
| 1721837  | 3    | GCGGC{ATG}ATG  | ydhK      | H4t2                      |
| 1741617  | 1    | GAACG{A}TTCCT  | cfa       | L4t1, L4t2                |
| 1758593  | 1    | GTGTT{A}TACAT  | sufS      | H4t1, H4t2                |
| 1759347  | 1    | GTGCG{C}AAAGC  | sufS      | M2t1                      |
| 1759408  | 4    | GTTAT{CGCC}CG  | sufS      | H1t1                      |
| 1826884  | 1    | TTGCC{T}TCTTC  | astB      | H3t2                      |
| 1846766  | 1    | GTACG{A}TCCCC  | selD      | Anc3                      |
| 2000992  | 1    | ACCTT{C}AGCGG  | fliA      | H1t2                      |
| 2542116  | 1    | GCACA{T}CGCCC  | cysP      | H4t1                      |
| 2798359  | 3    | TGCTG{TTG}TTC  | stpA      | L1t1                      |
| 3001892  | 1    | TTGCC{T}CACGC  | xdhA      | M3t1                      |
| 3332216  | 1    | GCCAT{A}ACTCA  | yhbE      | H2t2                      |
| 3347127  | 1    | TGATG{A}TCGTC  | rapZ      | H1t1                      |
| 3484539  | 3    | CGGGG{ACC}ACC  | prkB      | L3t1                      |
| 3565973  | 1    | GCGCG{T}TTTTT  | glgP      | L2t2                      |
| 3677186  | 1    | CGCCC{T}TCTTC  | yhjG      | HM1t1                     |
| 3690286  | 3    | GTTAA{GAC}GAC  | bcsB      | HM2t1                     |
| 3708281  | 1    | CGAAT{A}AGGCG  | dppA/proK | H3t2                      |

Table 2: Deletion Mutations (continued)

| position | size | local sequence | gene      | samples         |
|----------|------|----------------|-----------|-----------------|
| 3808408  | 1    | AATAC{A}AAAAA  | waaQ/waaA | HM4t2           |
| 3813388  | 3    | GCTAT{CGC}CGC  | dfp       | LM1t2           |
| 3818677  | 1    | CTTTC{T}TTTCC  | dinD/yicG | LM2t1,<br>LM2t2 |
| 4028063  | 1    | GATGT{G}CCCGC  | fadA      | M3t2            |
| 4088227  | 3    | CGCAT{CGG}CGG  | frvR      | HM3t1,<br>HM3t2 |
| 4321666  | 1    | CATCC{A}GTGCT  | phnG      | H2t1            |
| 4351362  | 1    | ATCGG{T}AACGA  | dcuS      | HM2t2           |
| 4638188  | 1    | GAAAT{C}CCCCC  | creD      | HM4t2           |

Table 3: Insertion Mutations

| position | new      | local sequence       | gene      | samples                  |
|----------|----------|----------------------|-----------|--------------------------|
| 284865   | G        | GCTGT{G}GGGGG        | yagG      | L3t2                     |
| 379236   | G        | GGAAA{G}GGGGG        | frmR/yaiO | H3t2,<br>HM3t1,<br>HM3t2 |
| 896980   | CGTTAC   | CACCA{CGTTAC}CGTTA   | potI      | AncAgg                   |
| 1063341  | A        | GTACG{A}AAAAA        | yccE      | M2t2                     |
| 1123326  | G        | AGTCA{G}GGGGG        | grxB/mdtH | M3t1, M3t2               |
| 1197660  | AATGAAAT | ATAGA{AATGAAAT}AATGA | ymfE/lit  | M4t1, M4t2               |
| 1758899  | C        | TGATG{C}CCCCC        | sufS      | HM4t2,<br>M1t1, M1t2     |
| 1758992  | C        | AACCG{C}CCCCC        | sufS      | M4t1, M4t2               |
| 1994095  | T        | GGCCC{T}TTGGT        | uvrY      | H3t2                     |
| 2309620  | T        | GTGGC{T}TTTTT        | ada       | H4t2                     |
| 2642322  | T        | ACGGT{T}ACATA        | rodZ/rlmN | M4t1                     |
| 2694800  | G        | CCCAA{G}GGGGG        | purL/mltF | M3t1, M3t2               |
| 2733757  | C        | AACCT{C}CCCCC        | pgeF      | H3t2                     |
| 2765785  | C        | GACTG{C}CCCCC        | yfjM/rnlA | H4t2                     |
| 3304806  | C        | AACAG{C}CCCCC        | mtr       | L4t2                     |
| 3559951  | T        | CCATA{T}TTGAC        | glpR      | LM4t2                    |
| 3690217  | CAG      | GCAGC{CAG}CAGCA      | bcsZ      | H1t2                     |
| 3927454  | G        | CGCCC{G}CGATG        | asnA      | LM2t1                    |
| 4321657  | T        | AGCAC{T}GGACA        | phnG      | H2t1                     |
| 4367422  | C        | CTGAA{C}GAGAG        | aspA      | H1t2                     |
| 4452828  | G        | CCGTA{G}GGGGC        | ytfT      | LM2t1,<br>LM2t2          |

Table 4: Mobile Element Mutations

| position | repeat name | strand | duplication size | repeat size | gene | samples    |
|----------|-------------|--------|------------------|-------------|------|------------|
| 252489   | IS1         | 1      | 8                | 768         | yafO | L2t2       |
| 1758639  | IS2         | 1      | 5                | 1331        | sufS | M3t1, M3t2 |
| 2381501  | IS1         | -1     | 9                | 768         | rbn  | LM2t2      |
